# Supplementary material for: Copper-mediated thiolation of carbazole derivatives and related N-heterocycle compounds
Source: Royal Society of Chemistry journal article supplement (doi:10.1039/c5ra04965b), 2015-01-01

Supporting information

**Copper-mediated thiolation of carbazole derivatives and related N-heterocycle compounds**

Longzhi Zhu,<sup>a</sup> Xin Cao,<sup>a</sup> Renhua Qiu,<sup>a,b\*</sup> Takanori Iwasaki,<sup>b</sup> Vutukuri Prakash Reddy,<sup>b</sup> Xinhua Xu,<sup>a</sup>

Shuang-Feng Yin<sup>a\*</sup> and Nobuaki Kambe<sup>a,b\*</sup>

<sup>a</sup>*College of Chemistry and Chemical Engineering, Hunan University, Changsha, 410082, P.R. China;*

<sup>b</sup>*Department of Applied Chemistry, Graduate School of Engineering, Osaka University, Suita, Osaka, 565-0871, Japan ;*

*renhuaqiu@hnu.edu.cn; sf\_yin@hnu.edu.cn; kambe@chem.eng.osaka-u.ac.jp*

# 1. Data of $^1\text{H}$ NMR and $^{13}\text{C}$ NMR of Compounds of 3a-3l, 5a-5e, 7a-7g, 9 and 1b.

## 1-(Phenylthio)-9-(pyrimidin-2-yl)-9H-carbazole (3a)

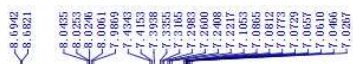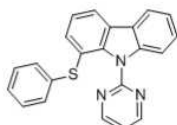

Chemical Formula:  $\text{C}_{22}\text{H}_{15}\text{N}_3\text{S}$   
Molecular Weight: 353.44

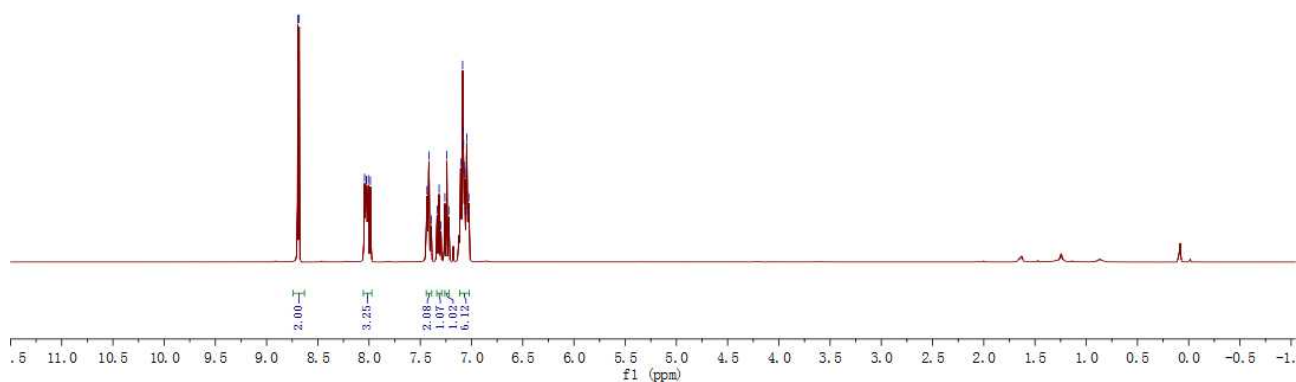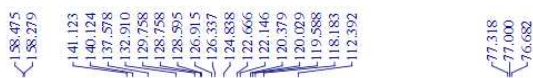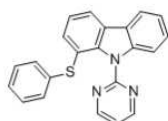

Chemical Formula:  $\text{C}_{22}\text{H}_{15}\text{N}_3\text{S}$   
Molecular Weight: 353.44

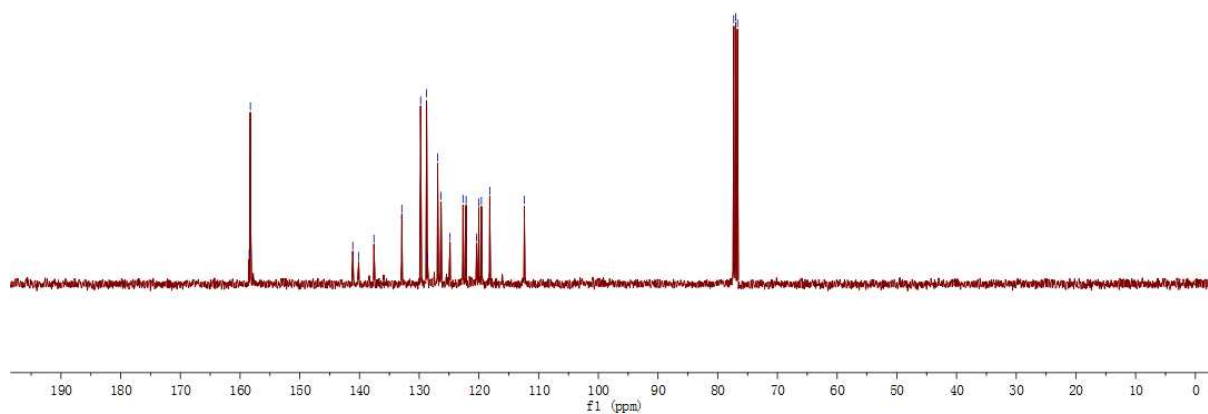

# 1-((4-Methylphenyl)thio)-9-(pyrimidin-2-yl)-9H-carbazole(3b)

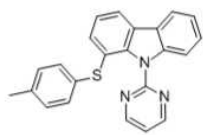

Chemical Formula: C<sub>23</sub>H<sub>17</sub>N<sub>3</sub>S  
Molecular Weight: 367.47

8.8061  
8.7944  
8.0691  
8.0488  
7.9909  
7.9719  
7.4604  
7.4419  
7.4219  
7.3685  
7.3495  
7.3282  
7.2584  
7.2398  
7.2205  
7.2024  
7.1905  
7.1786  
7.0439  
7.0240  
6.9876  
6.9678

2.2569

0.0001

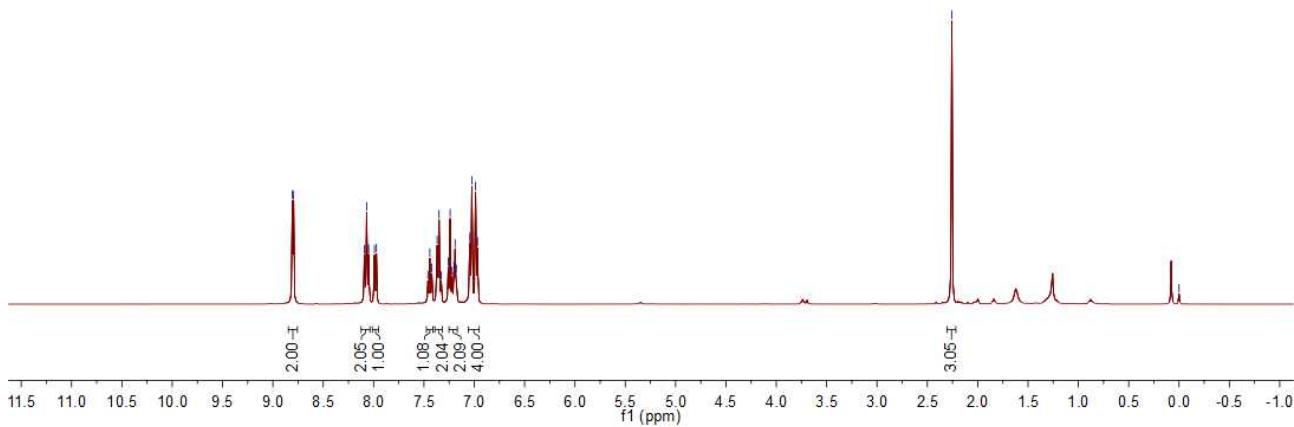

158.6340  
158.3606  
141.1823  
139.8062  
136.7666  
133.6812  
131.9693  
130.9550  
129.6523  
126.8728  
126.7983  
125.0058  
122.6875  
122.1533  
121.9059  
120.0357  
119.0082  
118.1358  
112.4920

77.3174  
76.9997  
76.6820

21.0078

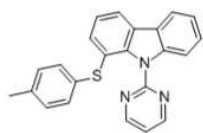

Chemical Formula: C<sub>23</sub>H<sub>17</sub>N<sub>3</sub>S  
Molecular Weight: 367.47

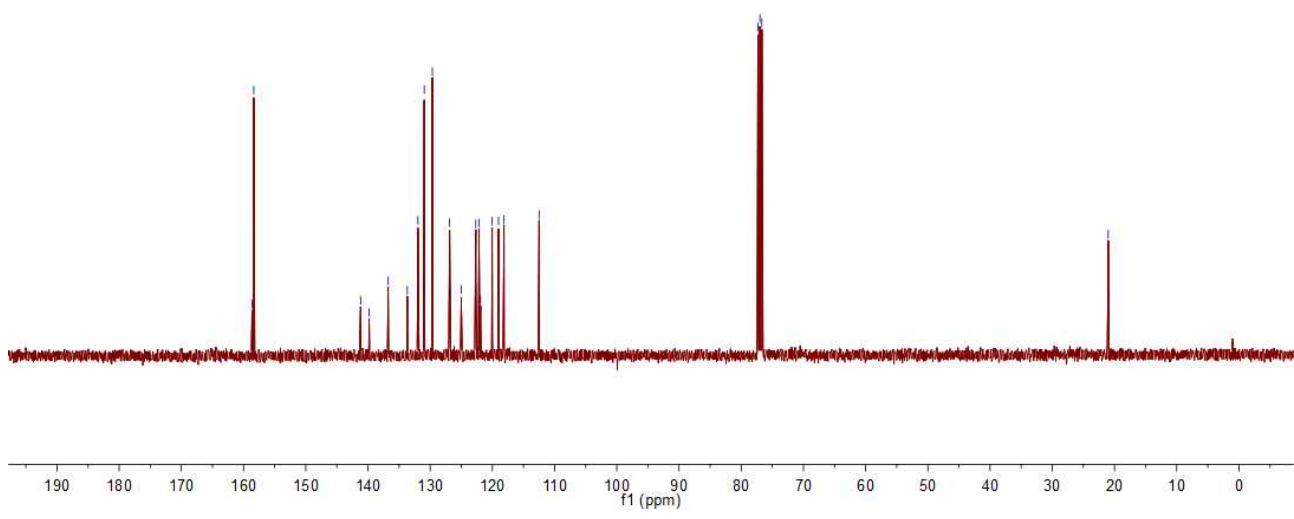

# 1-(4-Chlorophenyl)thio-9-(pyrimidin-2-yl)-9H-carbazole (3c)

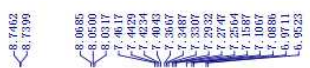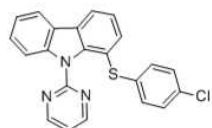

Chemical Formula: C<sub>22</sub>H<sub>14</sub>ClN<sub>3</sub>S  
Molecular Weight: 387.88

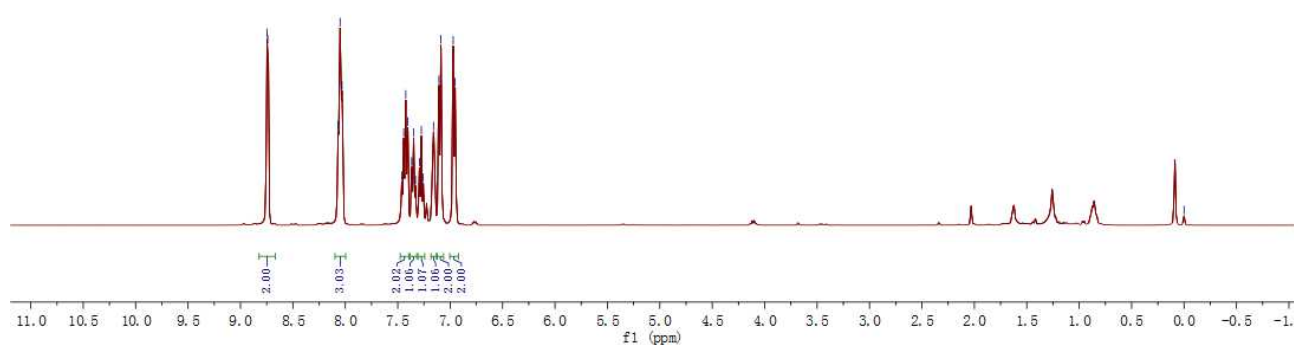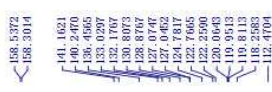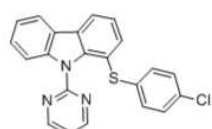

Chemical Formula: C<sub>22</sub>H<sub>14</sub>ClN<sub>3</sub>S  
Molecular Weight: 387.88

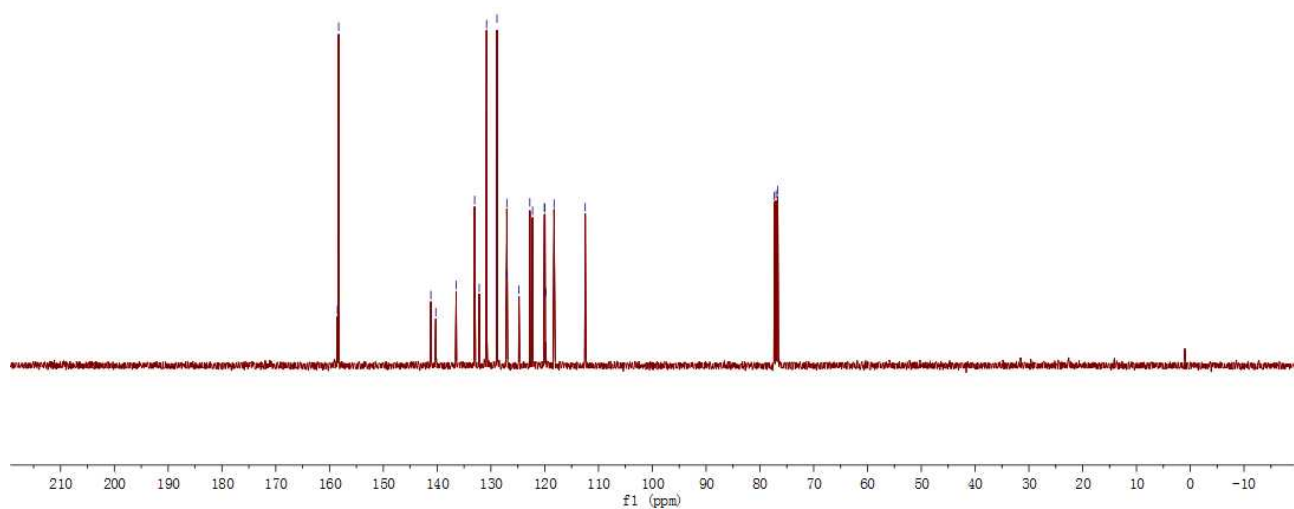

# 1-((4-Bromophenyl)thio)-9-(pyrimidin-2-yl)-9H-carbazole (3d)

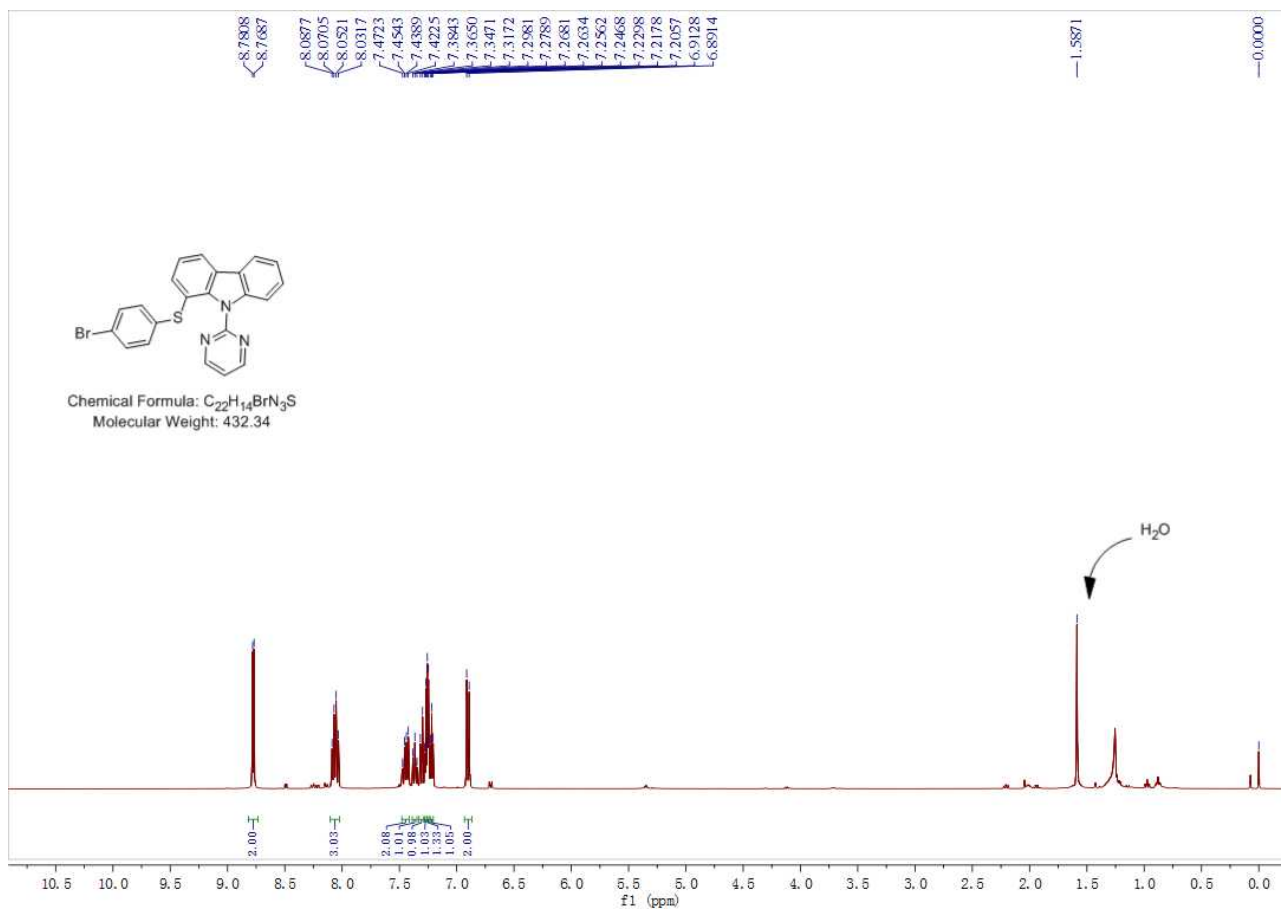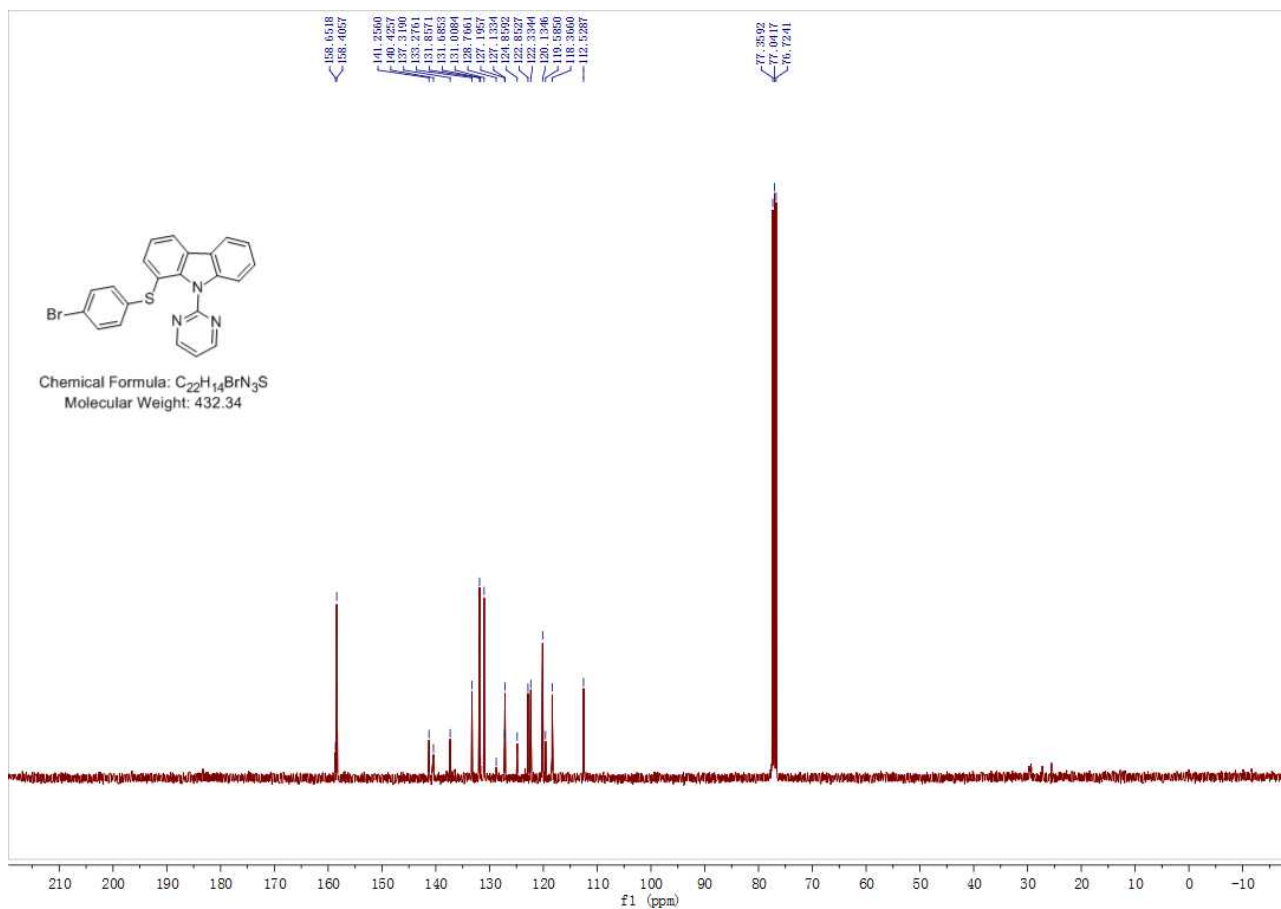

# 1-((4-Methoxyphenyl)thio)-9-(pyrimidin-2-yl)-9H-carbazole (3e)

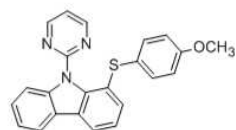

Chemical Formula: C<sub>23</sub>H<sub>17</sub>N<sub>3</sub>OS  
Molecular Weight: 383.47

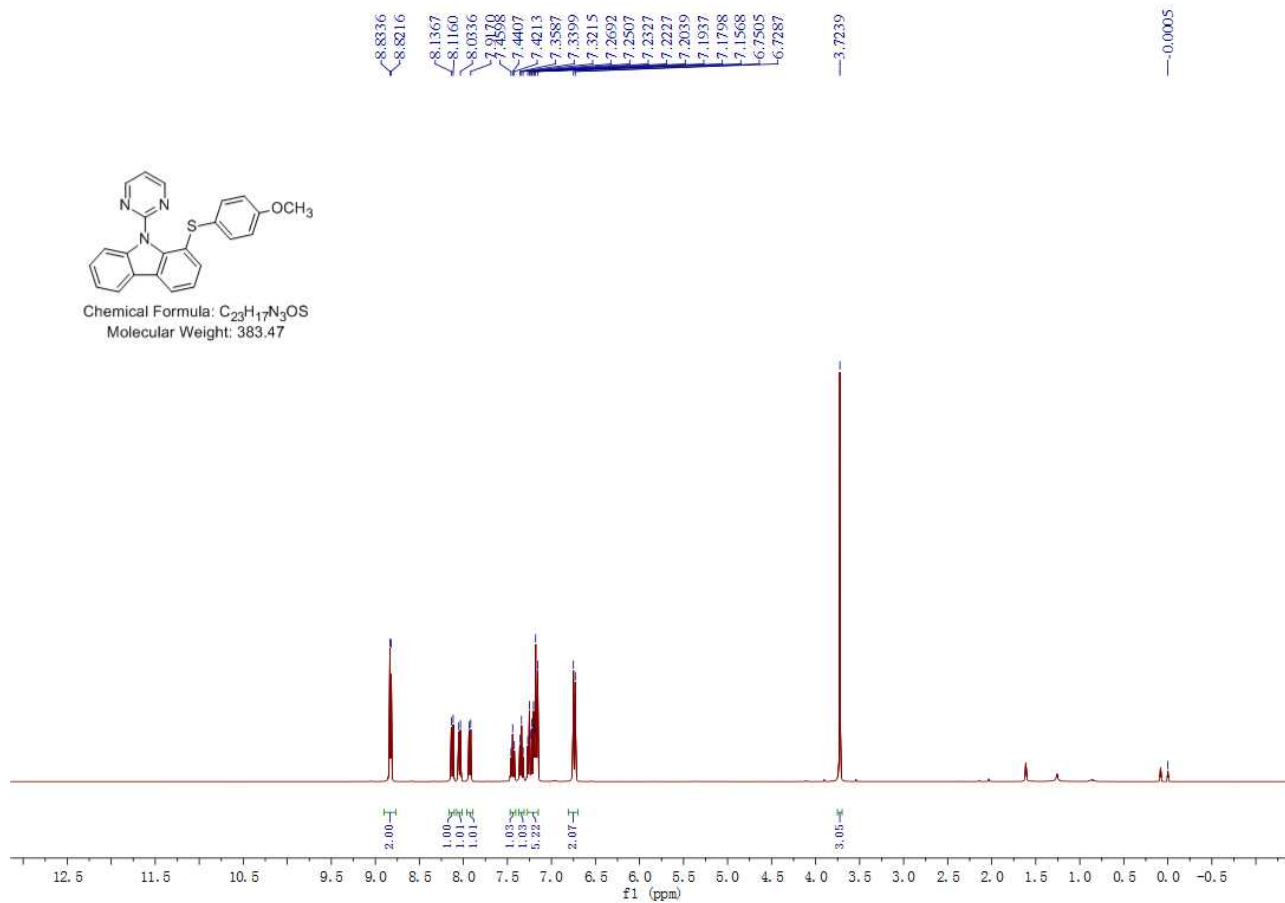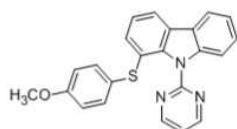

Chemical Formula: C<sub>23</sub>H<sub>17</sub>N<sub>3</sub>OS  
Molecular Weight: 383.4656

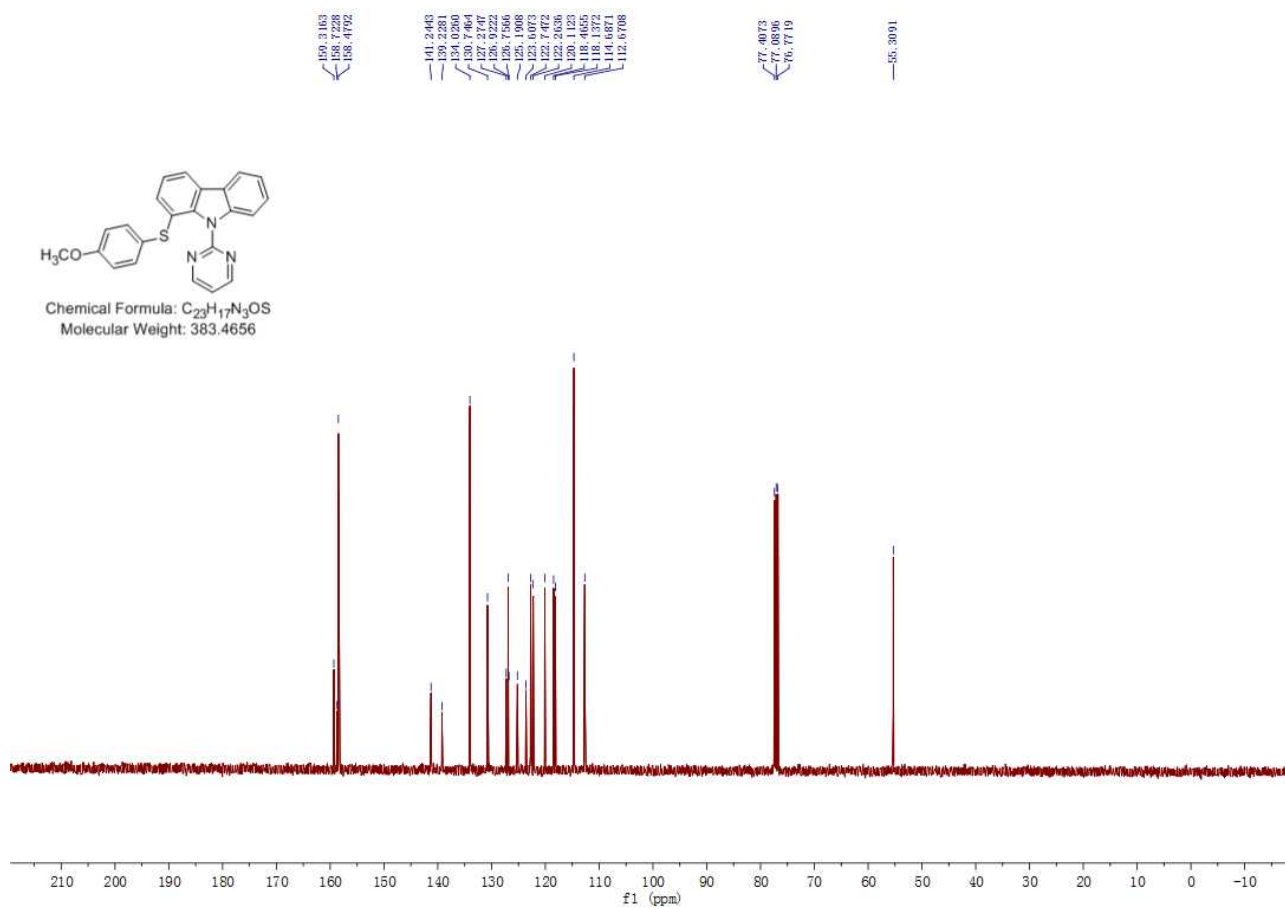

# 1-((2-Nitrophenyl)thio)-9-(pyrimidin-2-yl)-9H-carbazole (3f)

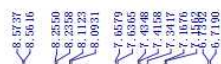

-0.0002

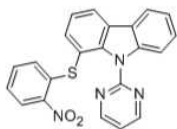

Chemical Formula: C<sub>22</sub>H<sub>14</sub>N<sub>4</sub>O<sub>2</sub>S  
Molecular Weight: 398.4372

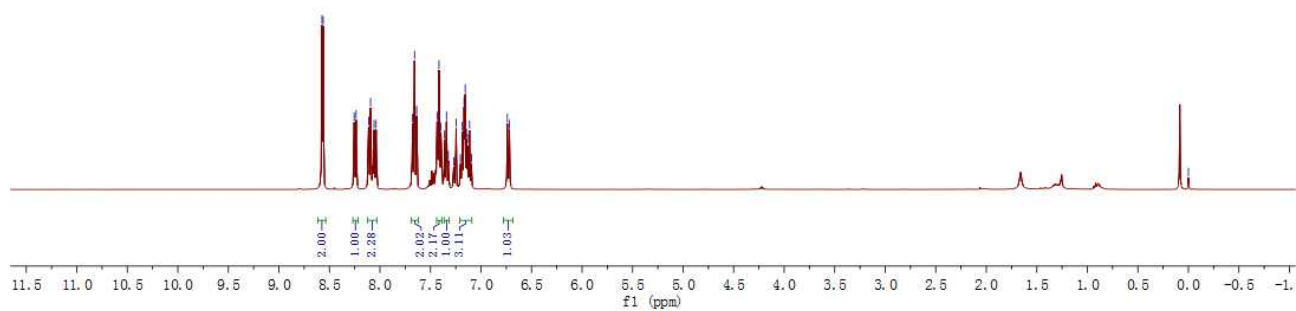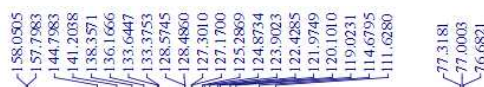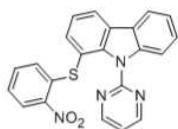

Chemical Formula: C<sub>22</sub>H<sub>14</sub>N<sub>4</sub>O<sub>2</sub>S  
Molecular Weight: 398.4372

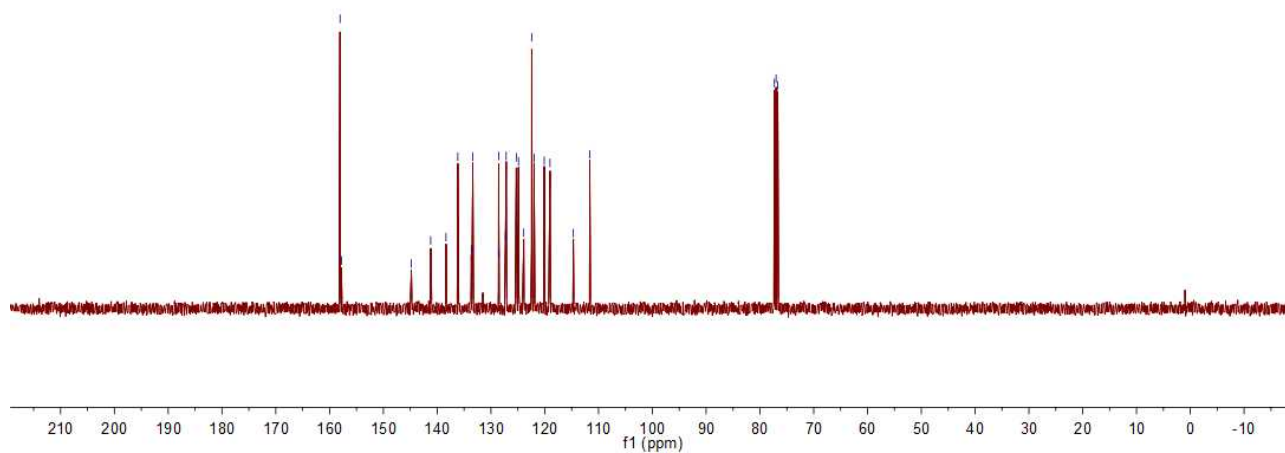

# 1-((3-Nitrophenyl)thio)-9-(pyrimidin-2-yl)-9H-carbazole (3g)

20140921-qrh-zlz-50  
z1z-50

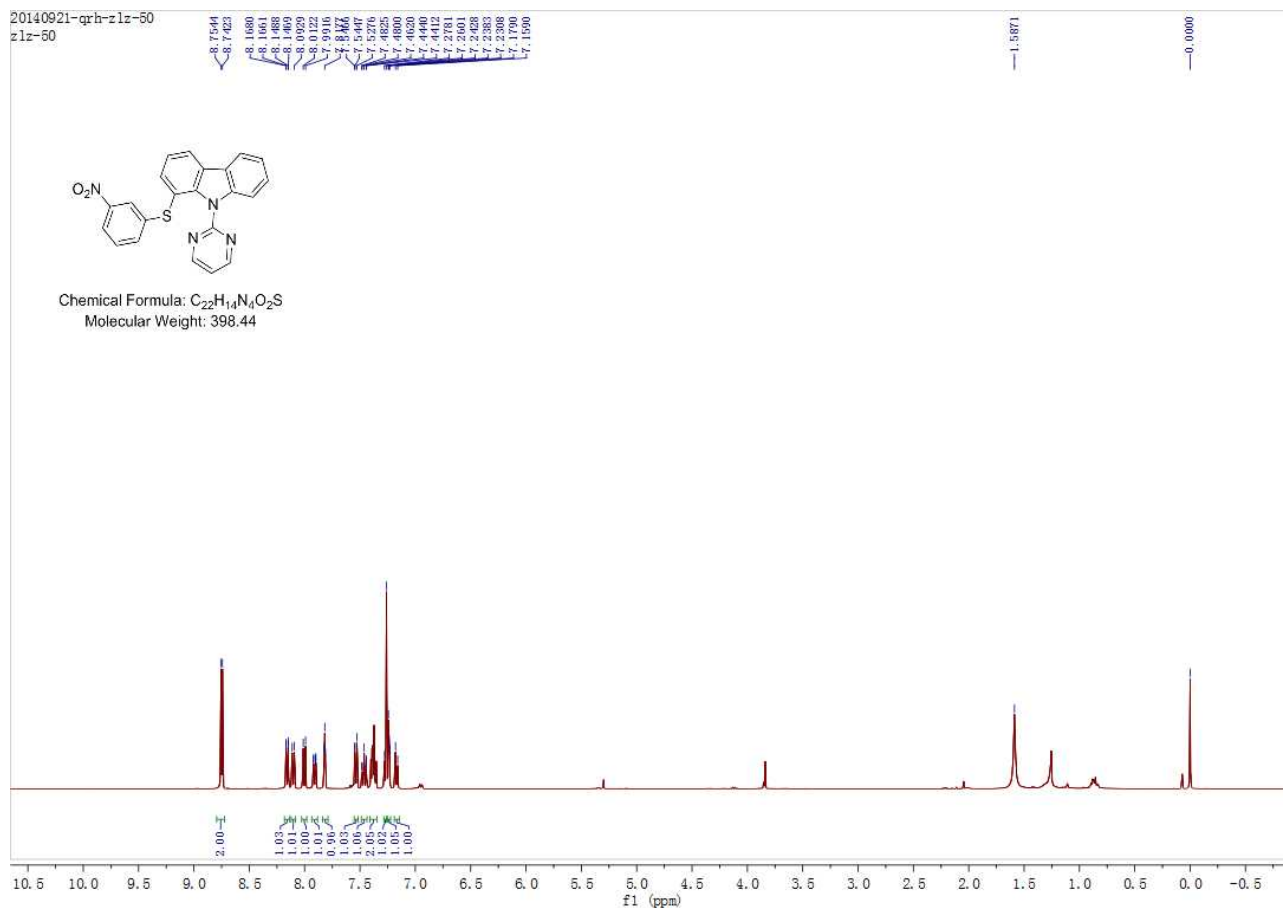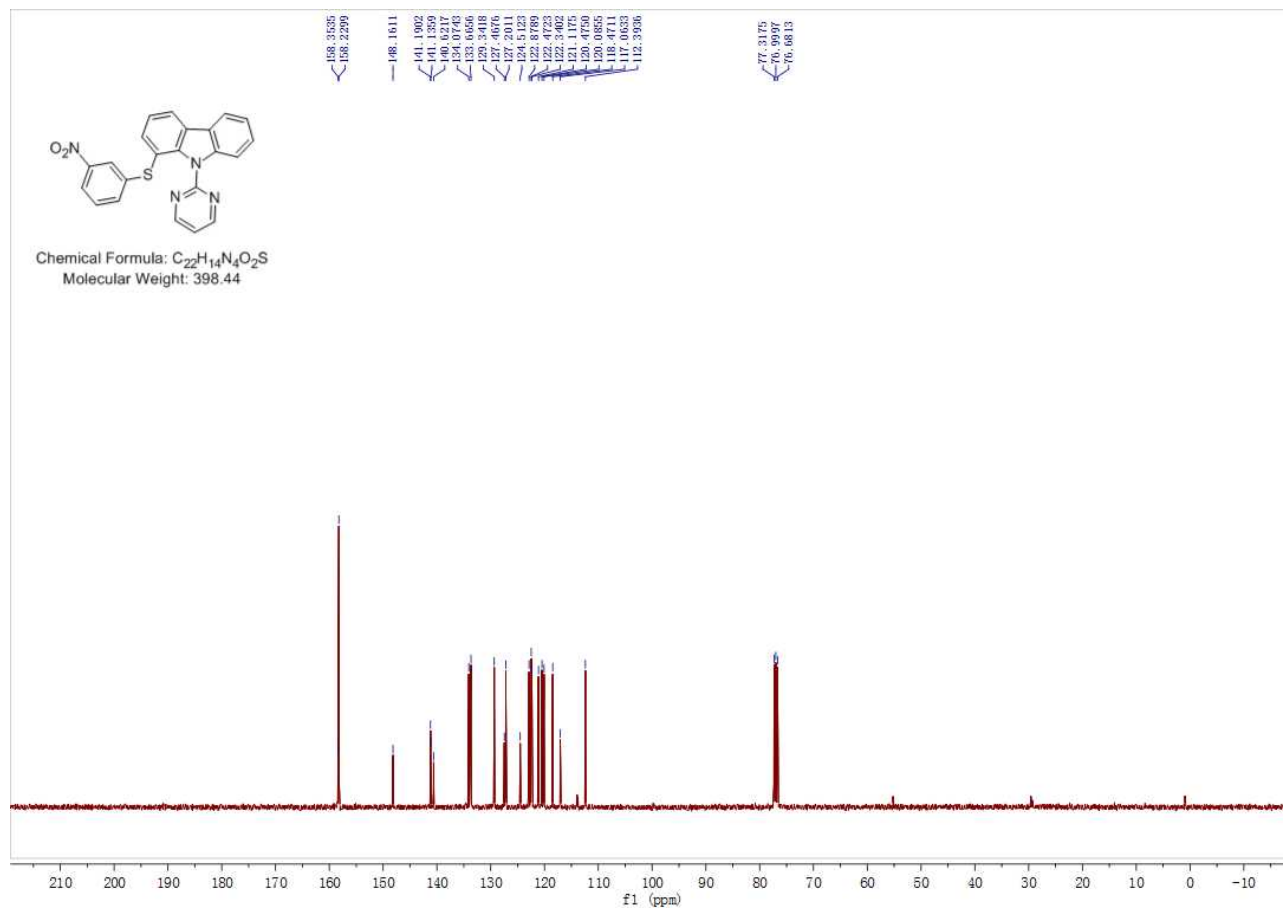



# 1-((4-Nitrophenyl)thio)-9-(pyrimidin-2-yl)-9H-carbazole (3h)

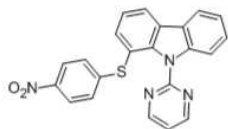

Chemical Formula: C<sub>22</sub>H<sub>14</sub>N<sub>4</sub>O<sub>2</sub>S  
Molecular Weight: 398.44

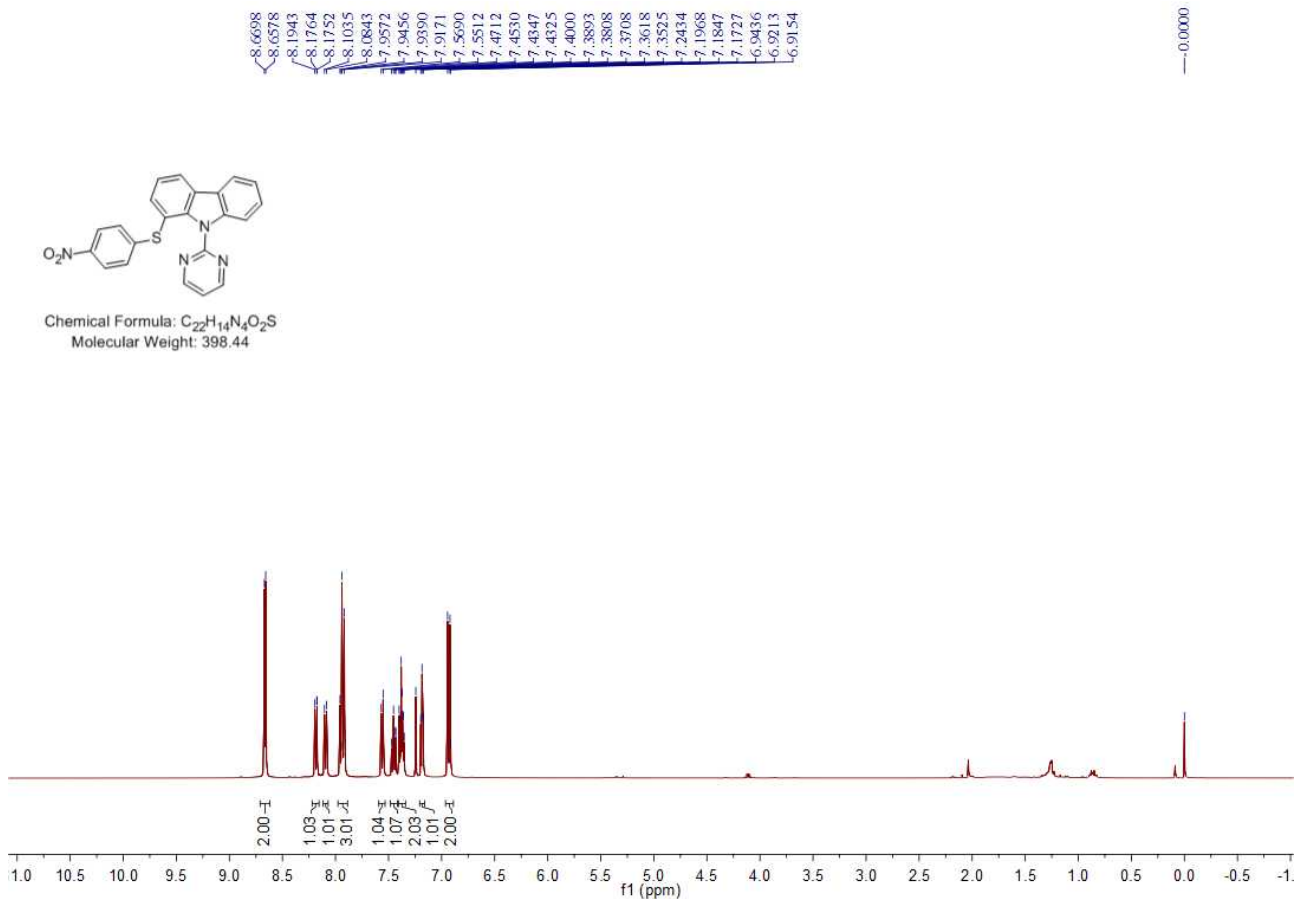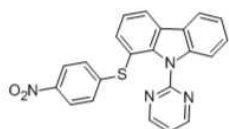

Chemical Formula: C<sub>22</sub>H<sub>14</sub>N<sub>4</sub>O<sub>2</sub>S  
Molecular Weight: 398.44

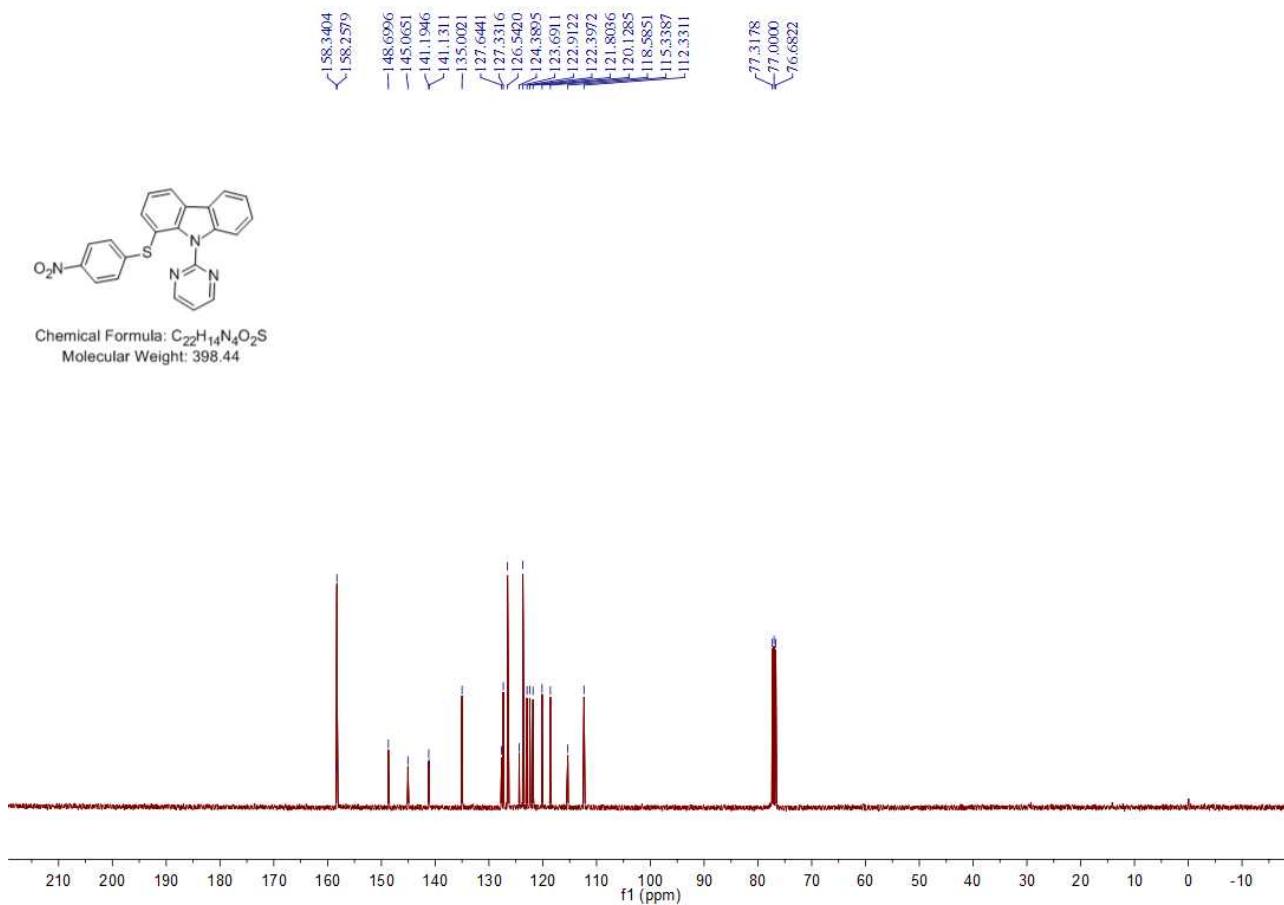

# 1-(Cyclohexylthio)-9-(pyrimidin-2-yl)-9H-carbazole (3i)

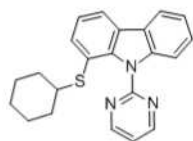

Chemical Formula: C<sub>22</sub>H<sub>21</sub>N<sub>3</sub>S  
Molecular Weight: 359.49

8.8351, 8.8230, 8.0544, 8.0352, 8.0120, 7.9928, 7.8938, 7.8732, 7.8653, 7.5664, 7.4308, 7.4123, 7.3923, 7.3344, 7.3150, 7.2956, 7.2762, 7.2266, 7.2143, 7.2076, 7.2023, 7.1903, 2.9290, 2.9049, 2.8805, 1.6440, 1.6070, 1.5896, 1.5800, 1.5622, 1.4749, 1.4640, 1.1433, 1.0973, 1.0847, 1.0530, 1.0270, -0.0015

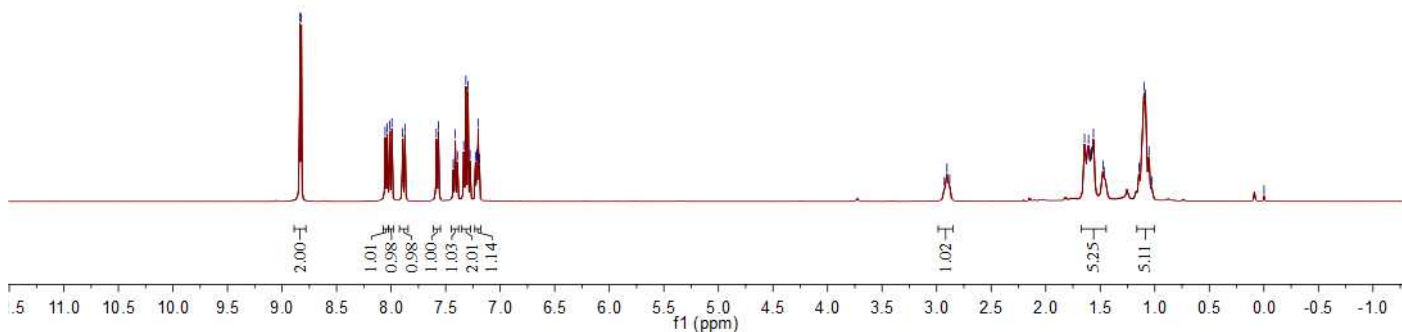

159.0675, 158.4021, 141.7994, 141.3853, 132.8729, 126.6312, 126.3257, 124.8605, 122.0800, 121.8049, 120.0385, 119.9669, 119.2910, 118.4046, 111.8458, 77.3184, 76.9996, 76.6824, 48.4314, 33.0271, 25.7909, 25.5919

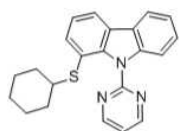

Chemical Formula: C<sub>22</sub>H<sub>21</sub>N<sub>3</sub>S  
Molecular Weight: 359.49

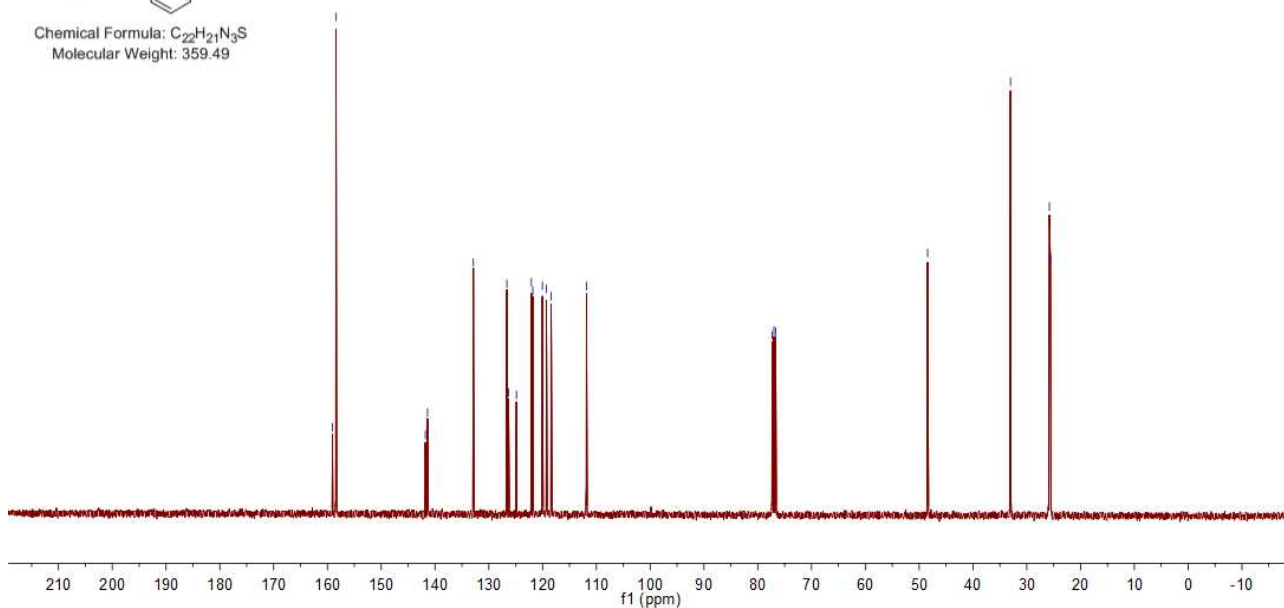

# 1-(Propylthio)-9-(pyrimidin-2-yl)-9H-carbazole (3j)

8.8778  
8.8660  
8.0677  
8.0485  
8.0345  
8.0138  
7.9850  
7.9659  
7.5647  
7.5456  
7.4565  
7.4382  
7.4180  
7.3615  
7.3494  
7.3429  
7.3318  
7.3244  
7.3128  
7.2925  
7.2468  
7.2351

2.7717  
2.7534  
2.7353

1.4504  
1.4324  
1.4142  
1.3959  
1.3777  
1.3595  
0.8664  
0.8491  
0.8313  
0.8129

0.0094

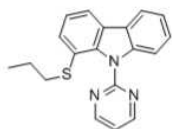

Chemical Formula: C<sub>19</sub>H<sub>17</sub>N<sub>3</sub>S  
Molecular Weight: 319.42

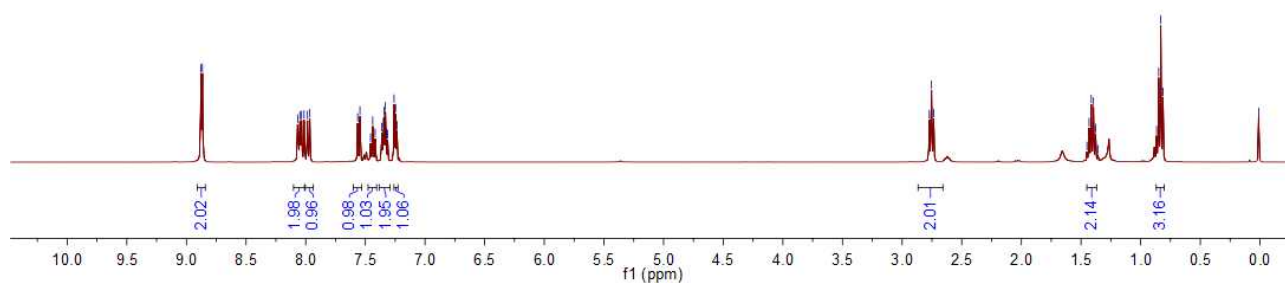

158.9653  
158.4351  
141.4050  
140.5895  
130.1887  
126.7907  
126.5415  
125.1708  
122.5383  
122.3095  
122.0743  
120.1304  
118.5046  
118.2541  
112.2912

77.3803  
77.0629  
76.7448

38.5188

22.8062

13.3481

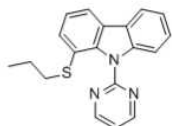

Chemical Formula: C<sub>19</sub>H<sub>17</sub>N<sub>3</sub>S  
Molecular Weight: 319.42

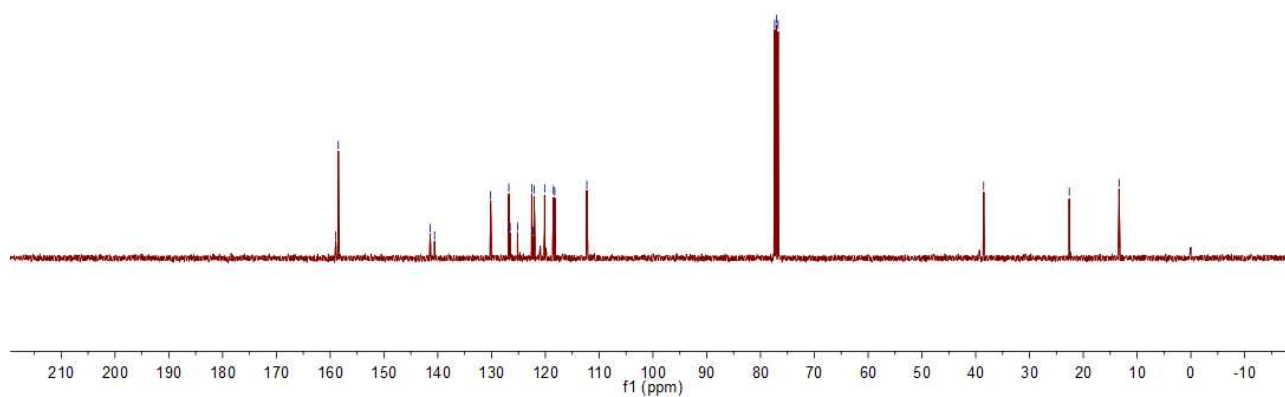

# 1-(Benzylthio)-9-(pyrimidin-2-yl)-9H-carbazole (3k)

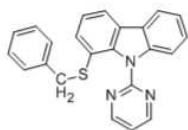

Chemical Formula:  $C_{23}H_{17}N_3S$   
Molecular Weight: 367.47

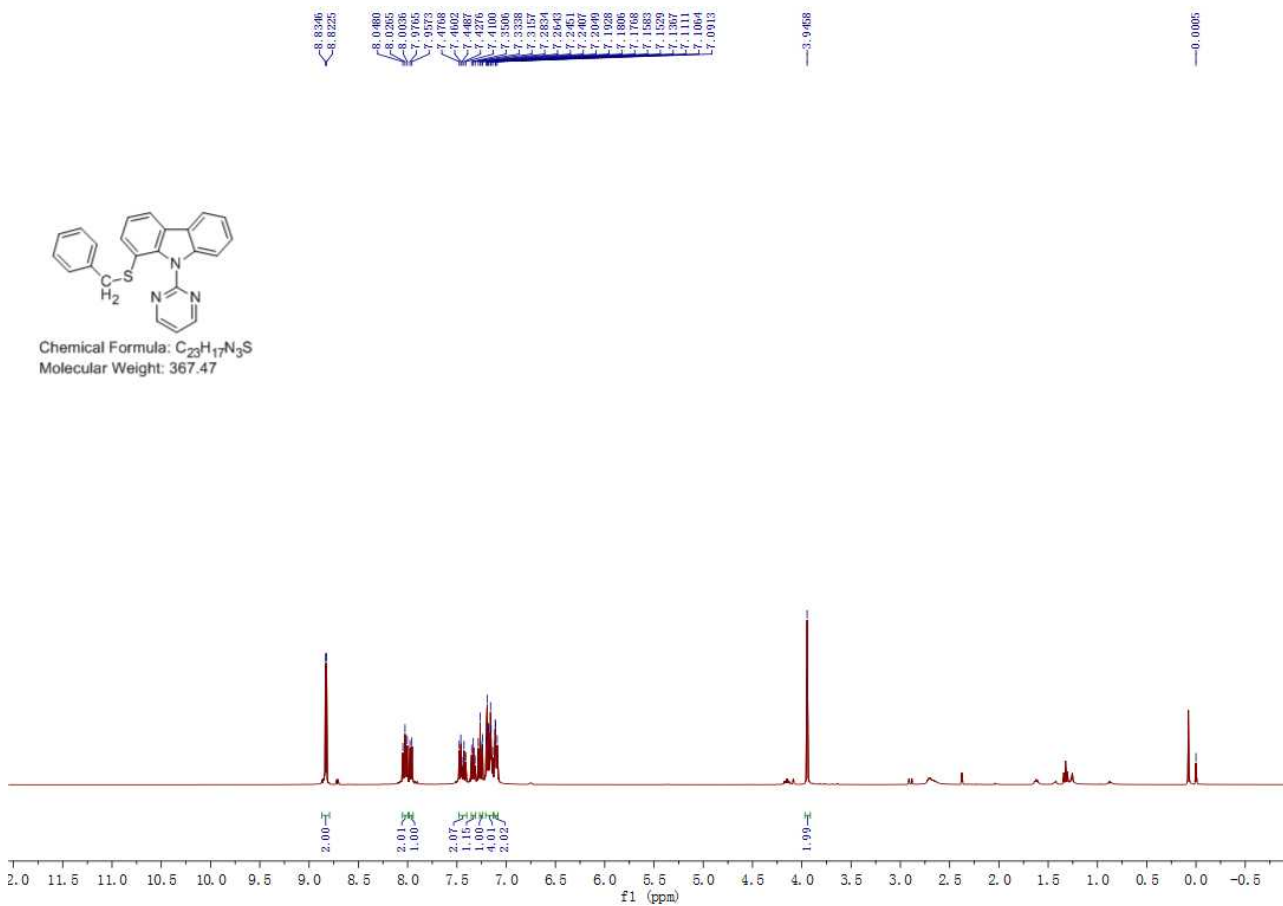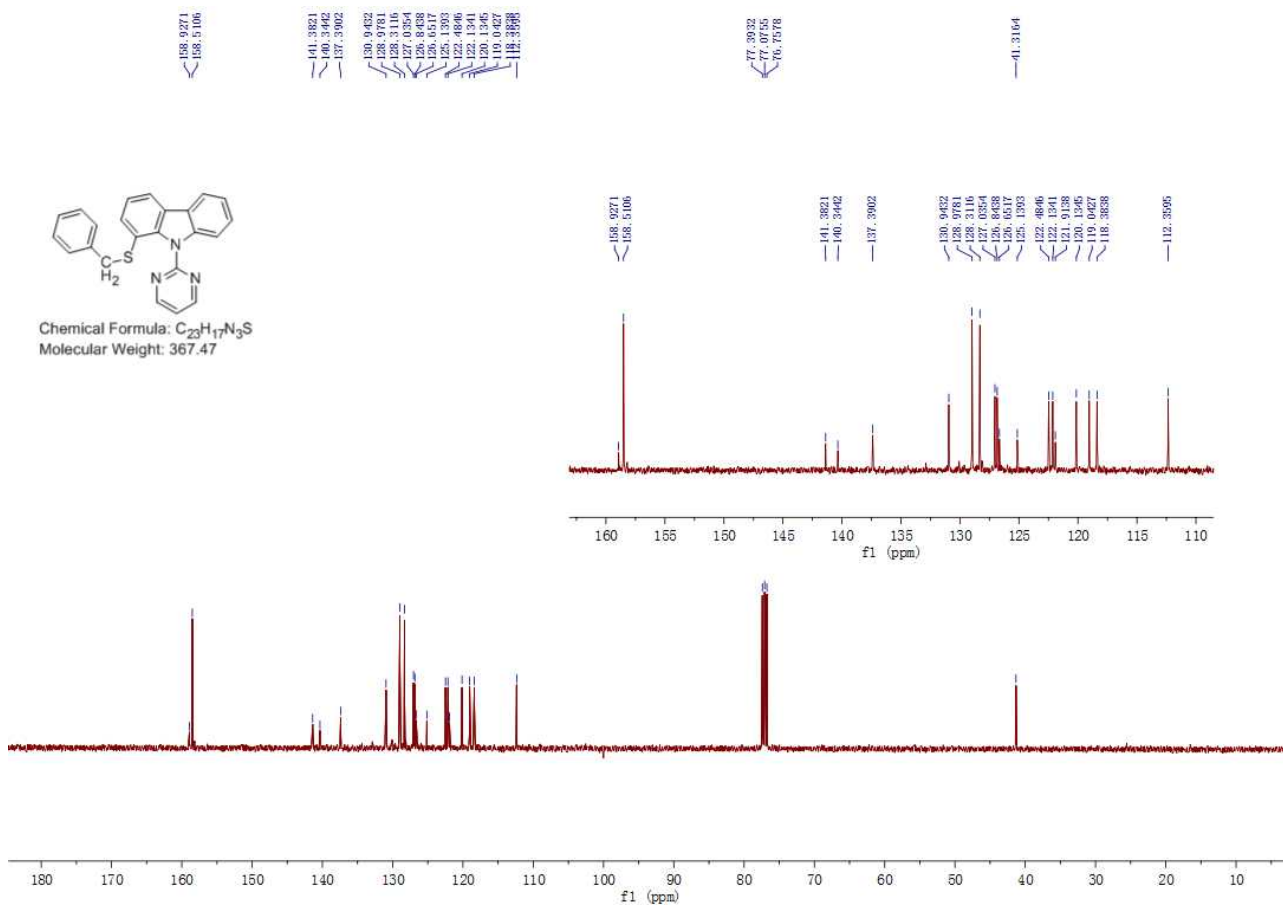

Methyl 3-((9-(pyrimidin-2-yl)-9H-carbazol-1-yl)thio)propano-ate(3I)

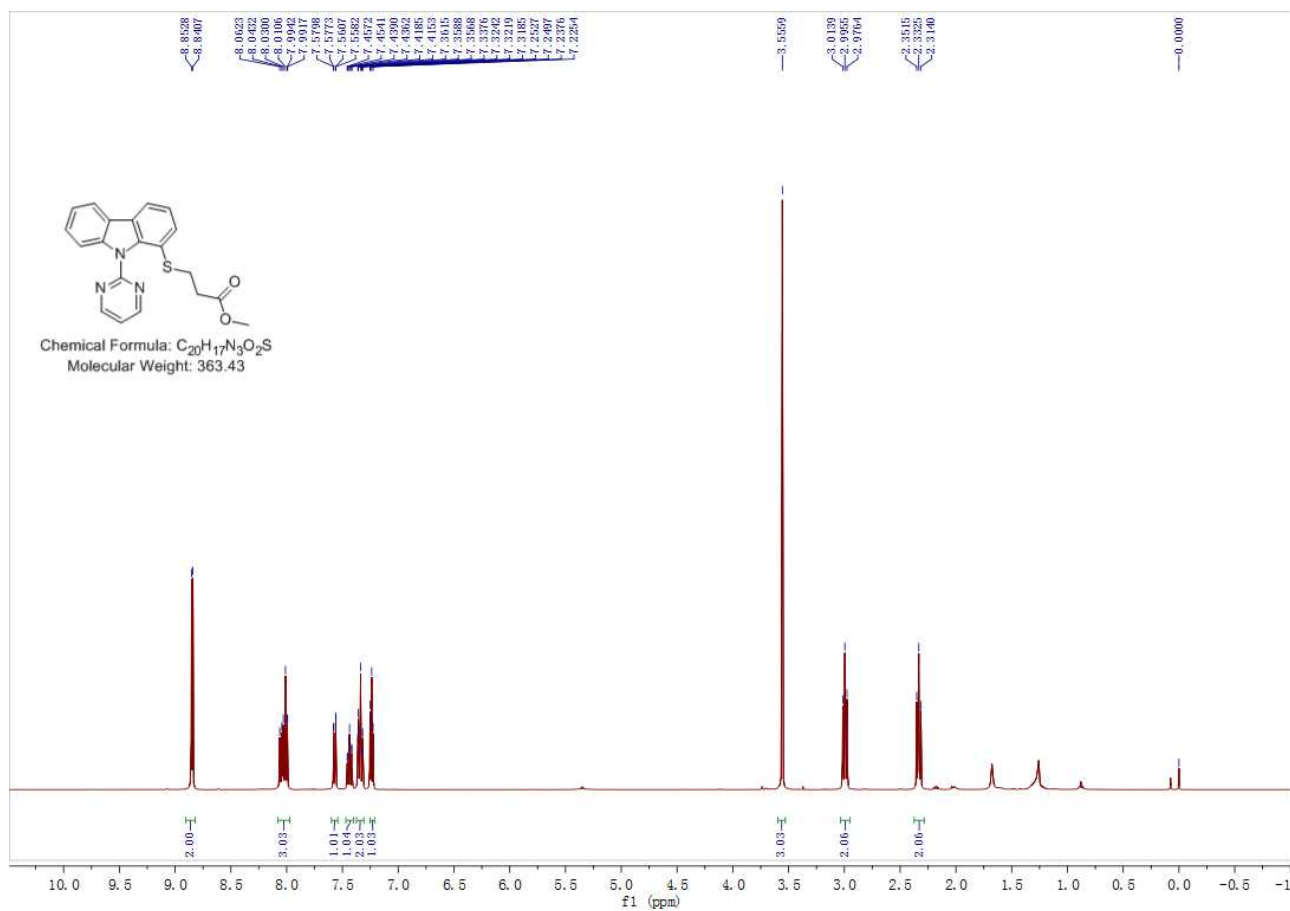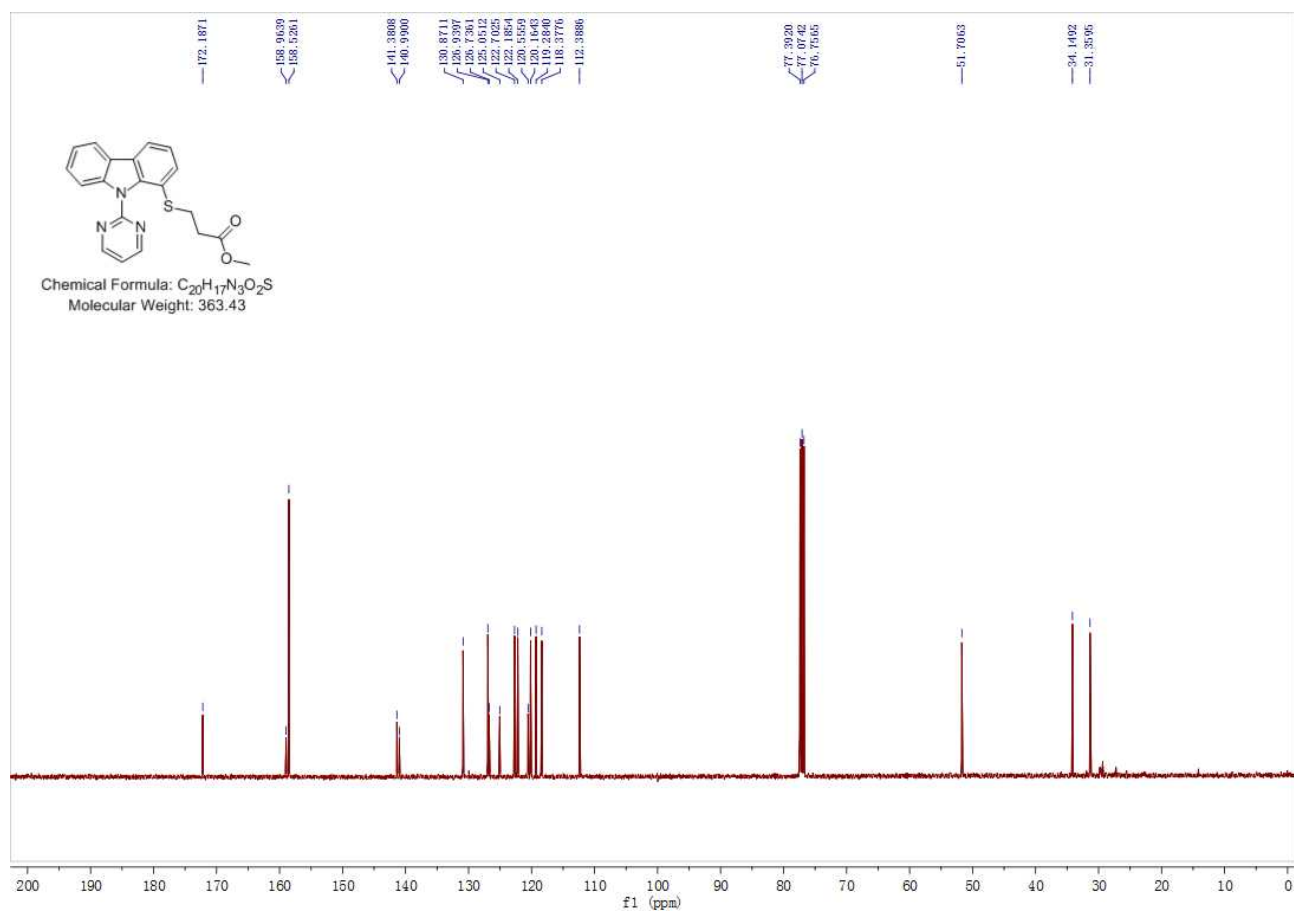

# 10-(Phenylthio)benzo[h]quinoline (5a)

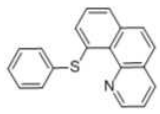

Chemical Formula: C<sub>19</sub>H<sub>13</sub>NS  
Molecular Weight: 287.38

9.1440  
9.1396  
9.1351  
9.1286  
8.1859  
8.1311  
8.1151  
8.1111  
7.7384  
7.7291  
7.7251  
7.7197  
7.7165  
7.7063  
7.7026  
7.6956  
7.6920  
7.5819  
7.4883  
7.4771  
7.4751  
7.4683  
7.4632  
7.4501  
7.4457  
7.4374  
7.4347  
7.4303  
7.4200  
7.4171  
7.4156  
7.3476  
7.3460  
7.3285  
7.0847  
7.0822  
7.0807  
7.0625

-0.0002

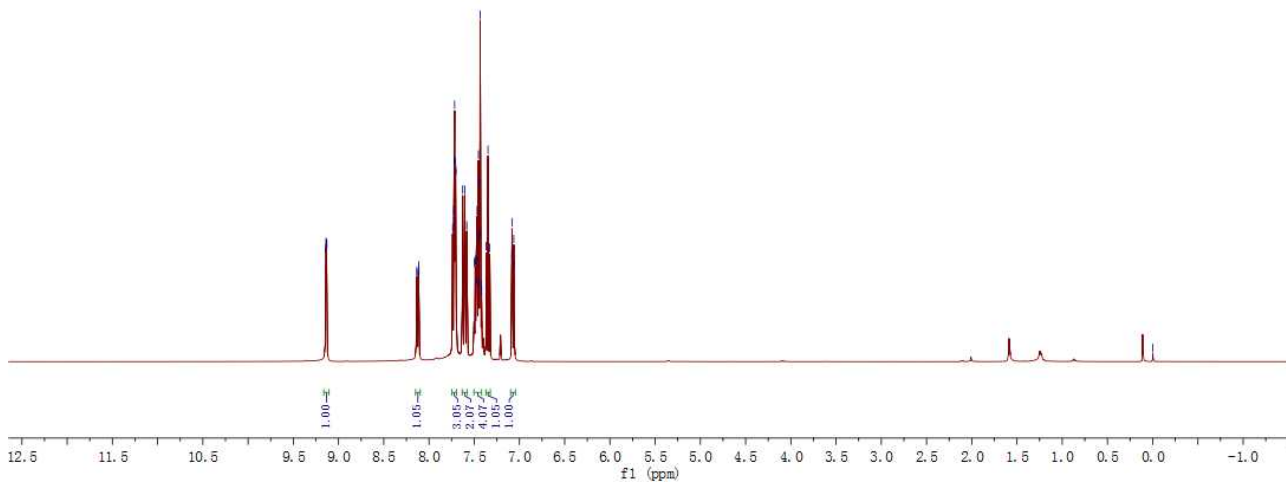

147.4832  
146.4728  
140.6728  
136.3459  
135.2678  
135.2213  
134.8416  
129.8816  
129.0506  
128.5964  
127.4386  
127.3790  
125.6107  
125.5615  
124.6300  
121.0397

77.5173  
77.0911  
76.6811

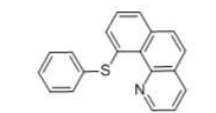

Chemical Formula: C<sub>19</sub>H<sub>13</sub>NS  
Molecular Weight: 287.38

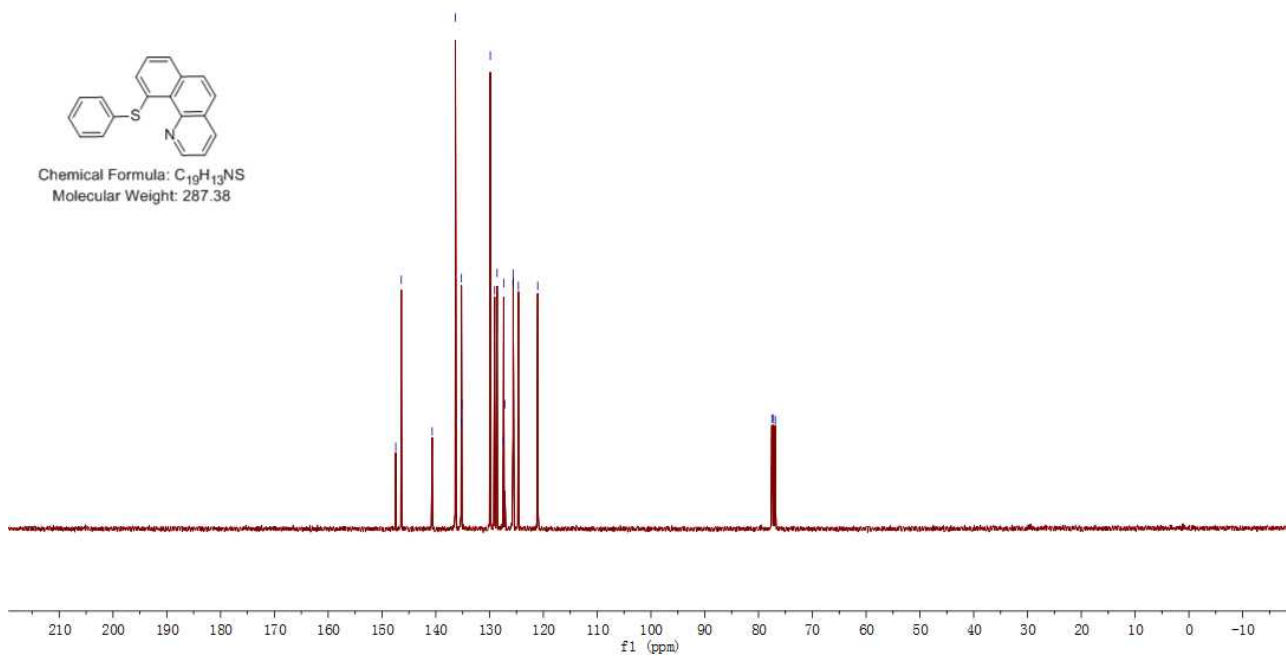

# 10-(4-Methylphenyl)thio)benzo[*h*]quinoline (5b)

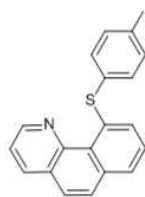

Chemical Formula: C<sub>20</sub>H<sub>15</sub>NS  
Molecular Weight: 301.40

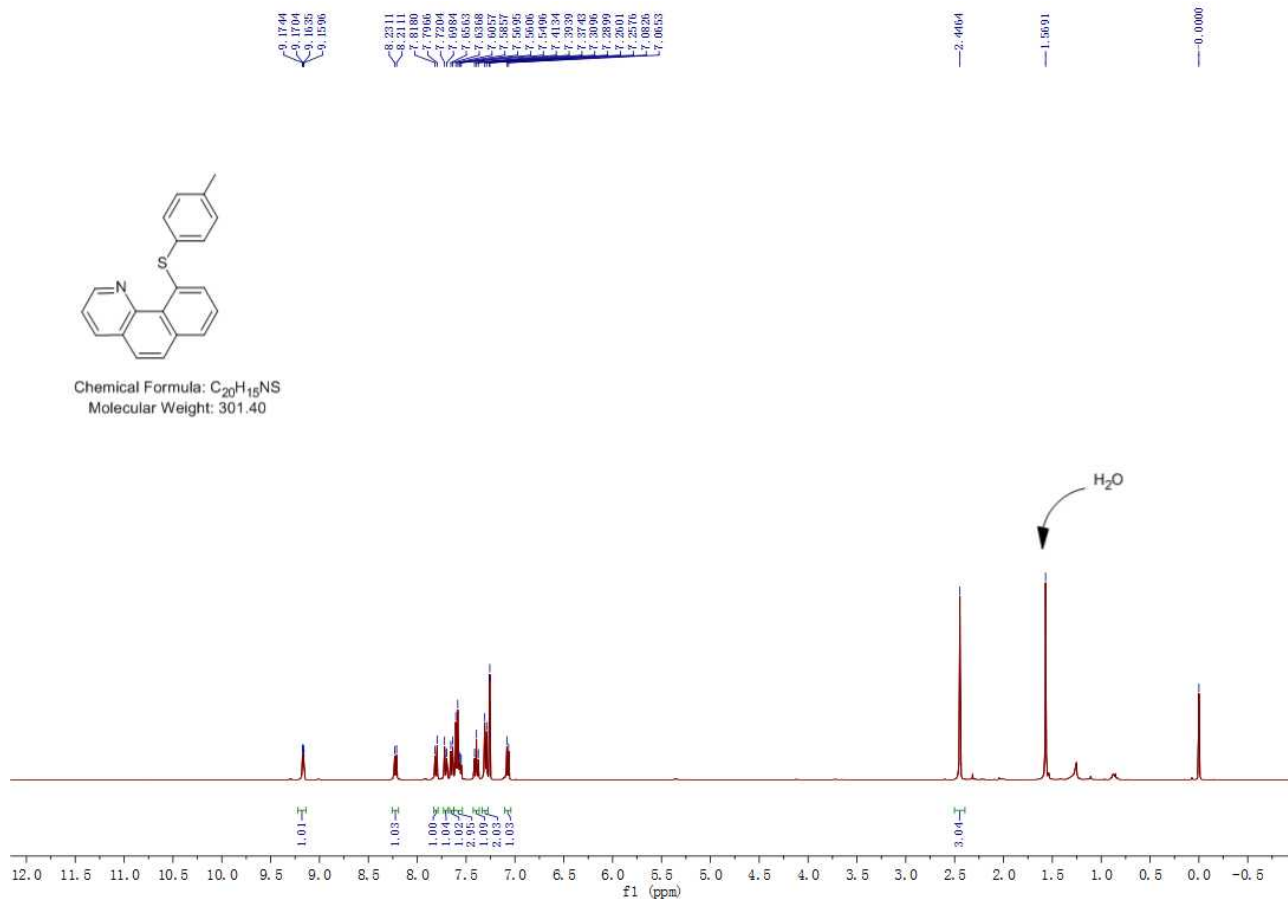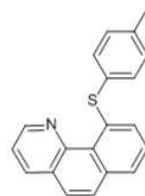

Chemical Formula: C<sub>20</sub>H<sub>15</sub>NS  
Molecular Weight: 301.40

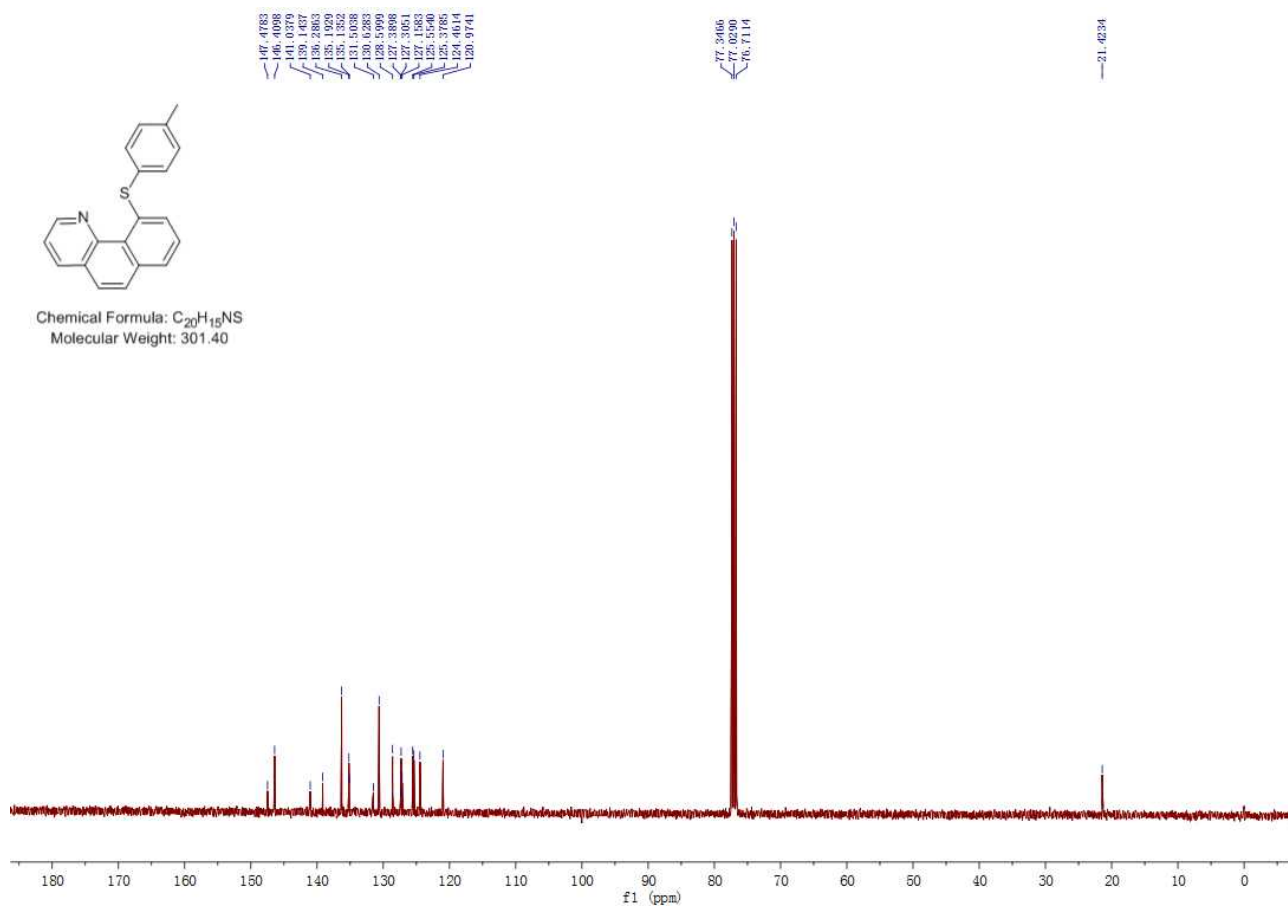

# 10-(4-chlorophenyl)thio)benzo[h]quinoline (5c)

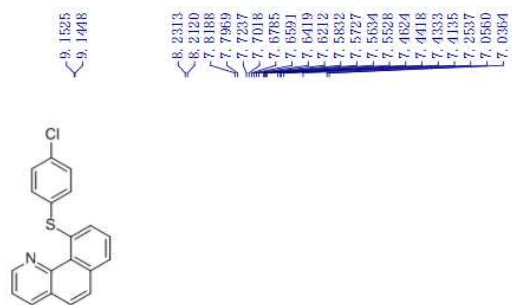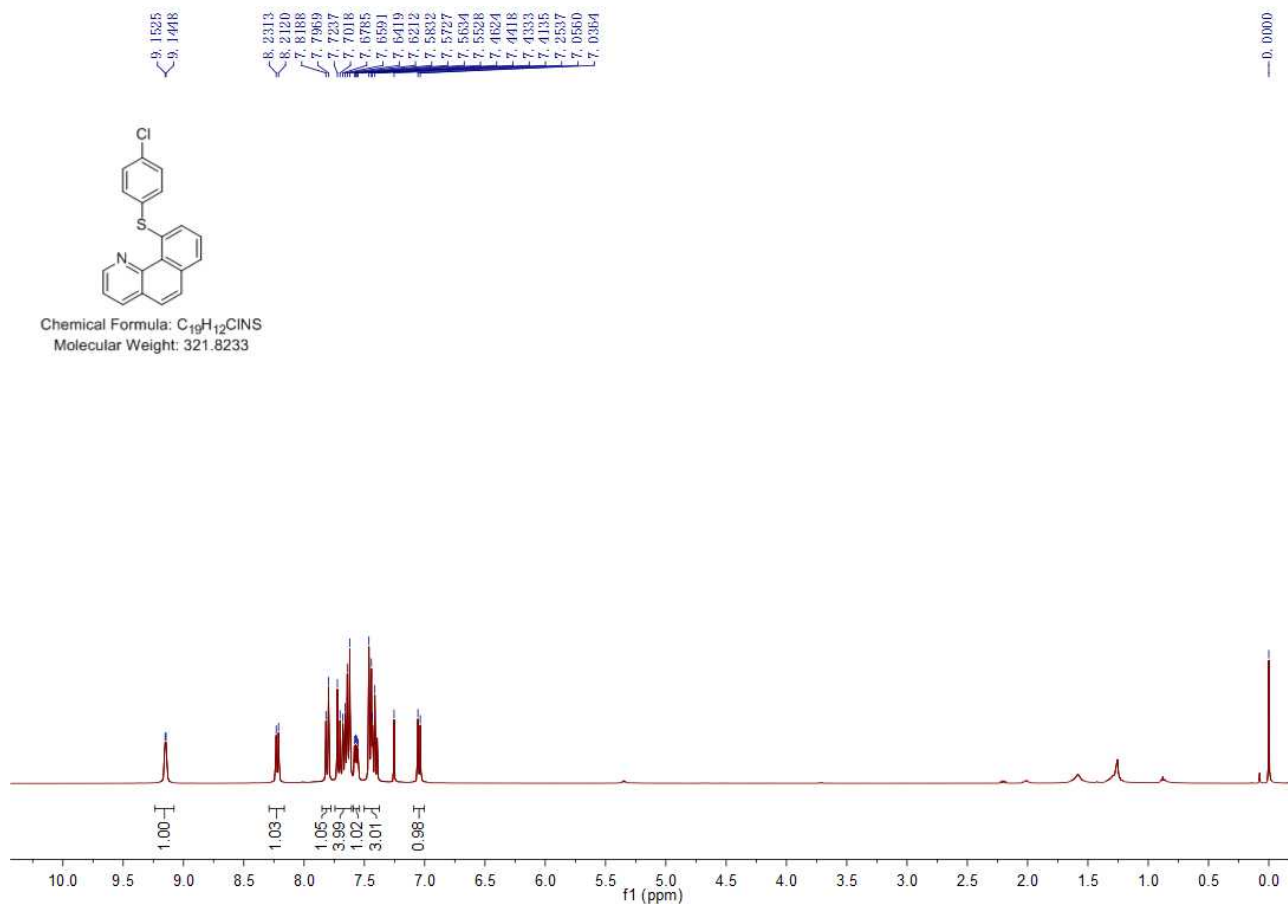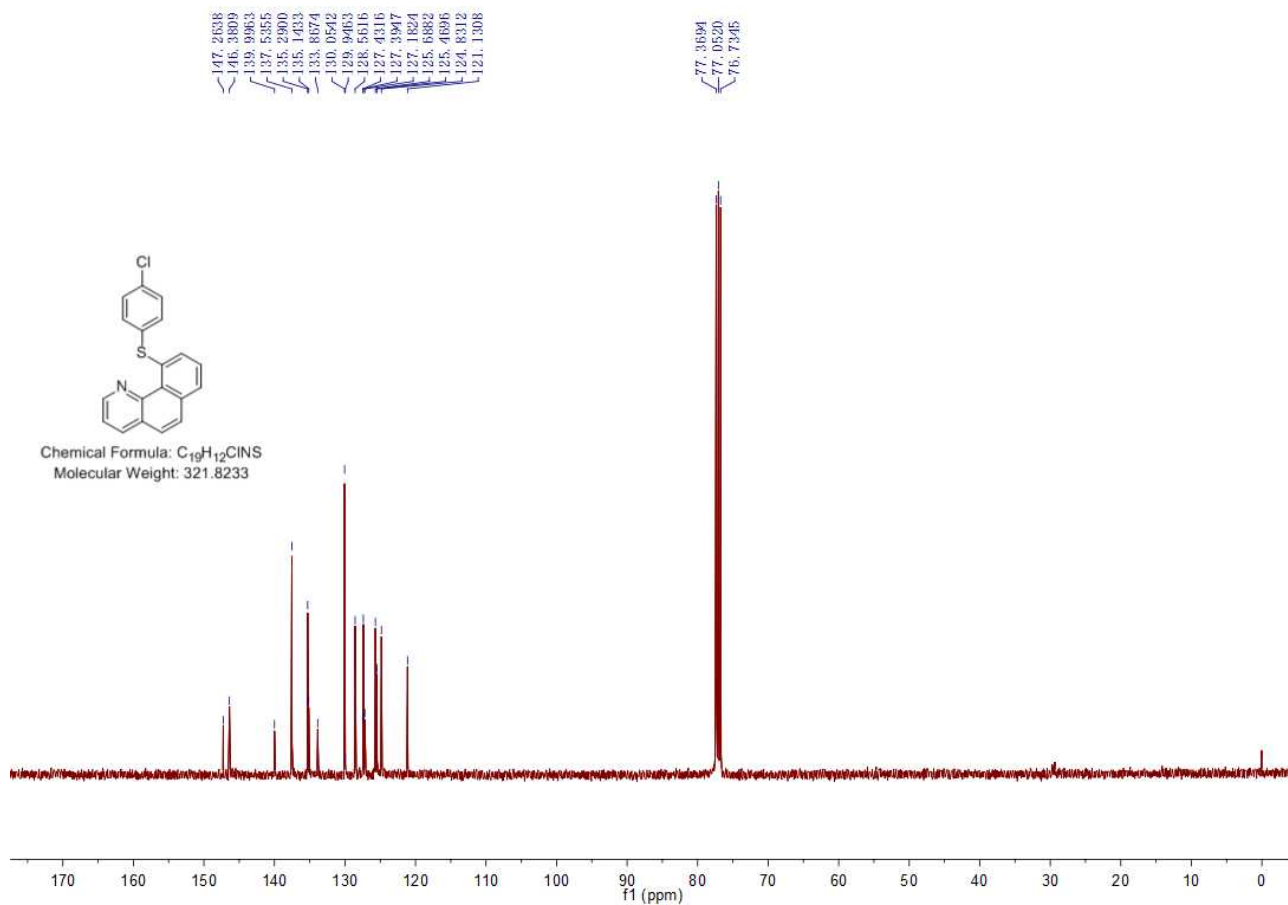



# 10-((4-methoxyphenyl)thio)benzo[*h*]quinoline (5d)

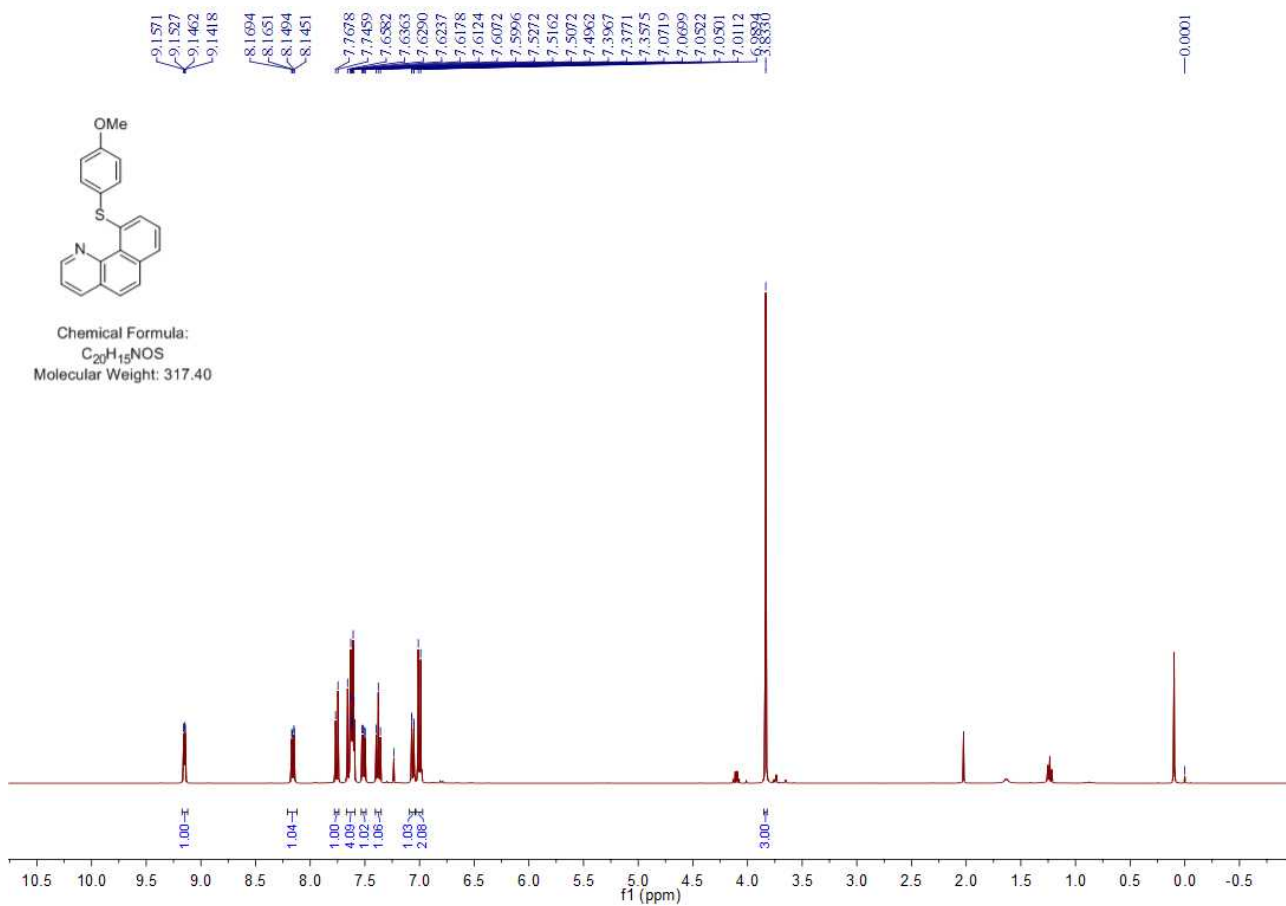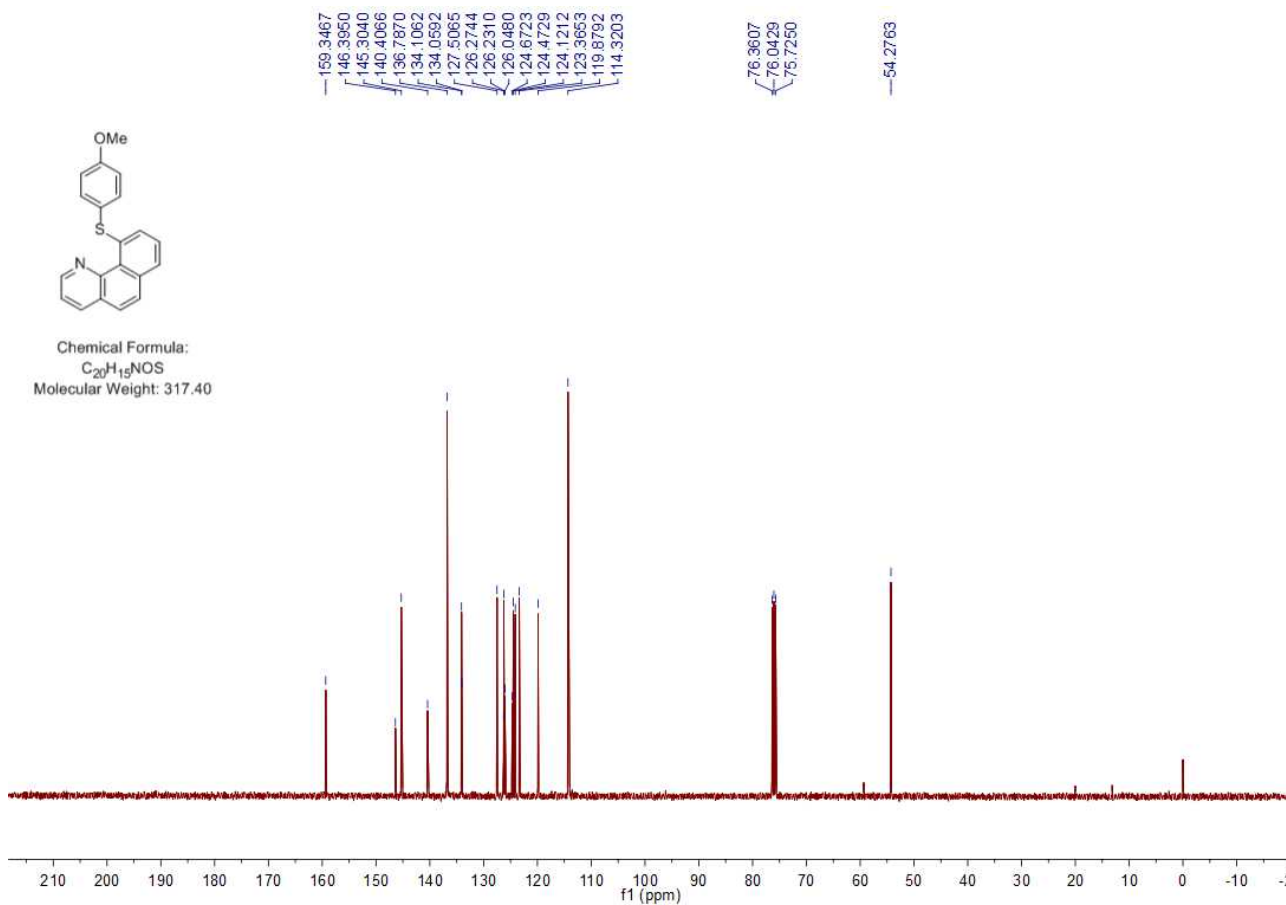

# 10-(Propylthio)benzo[h]quinoline (5e)

9.1389  
8.1324  
8.1259  
8.1214

8.1696  
8.1498  
7.7914  
7.7696  
7.6905  
7.6780  
7.6579  
7.6549  
7.6199  
7.6079  
7.5213  
7.5194  
7.3014  
7.2894  
7.2581

3.6985

3.0517  
3.0332  
3.0140

1.9591  
1.9404  
1.9216  
1.9031

1.2030  
1.1896  
1.1851

0.0140

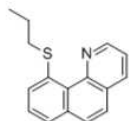

Chemical Formula: C<sub>16</sub>H<sub>15</sub>NS  
Molecular Weight: 253.36

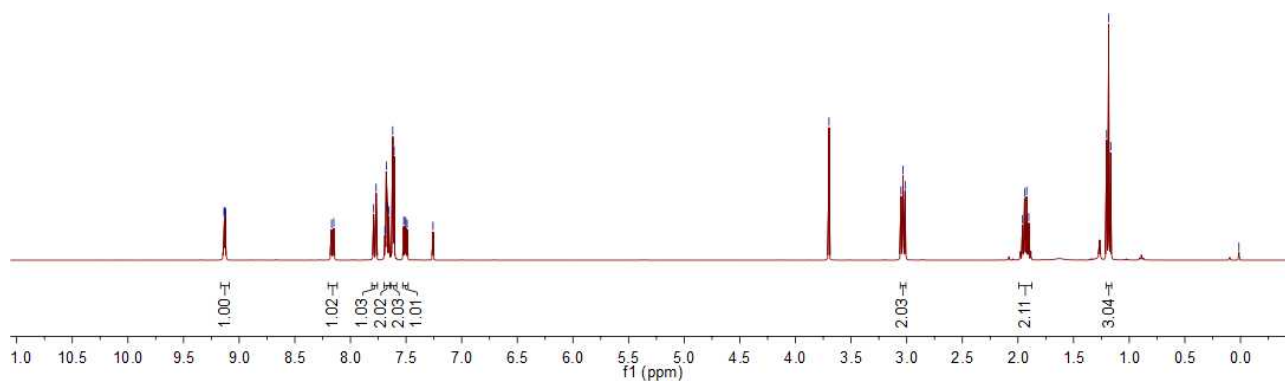

147.4442  
146.2465

139.6032  
135.2211  
134.9808  
128.5603  
127.9924  
127.2544  
127.0108  
125.5513  
123.9566  
123.0203  
120.6853

77.3182  
77.0003  
76.6826

66.9533

35.5670

21.4337

14.3054

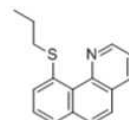

Chemical Formula: C<sub>16</sub>H<sub>15</sub>NS  
Molecular Weight: 253.36

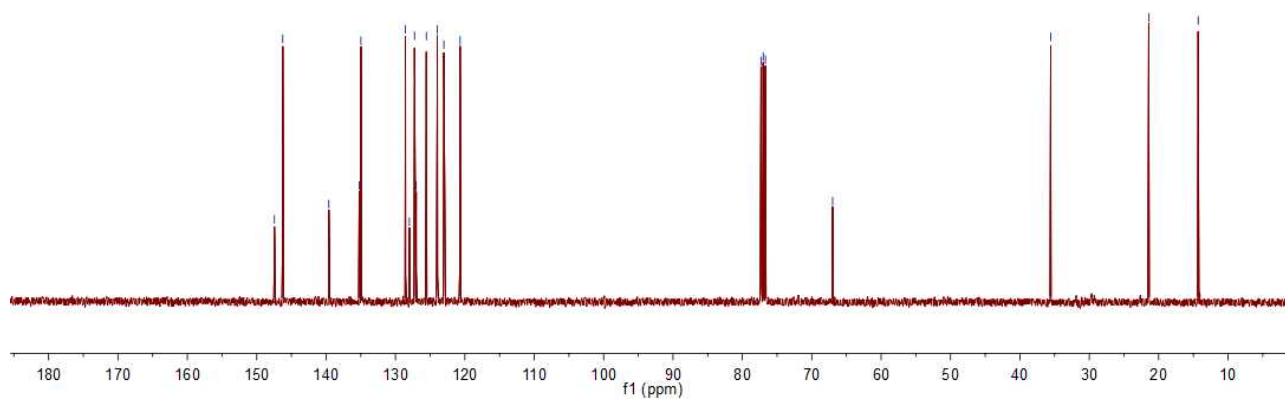

2-((Phenylthio)thio)-1-(pyrimidin-2-yl)-1H-indole (7a)

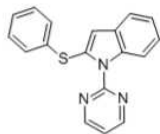

Chemical Formula: C<sub>18</sub>H<sub>13</sub>N<sub>3</sub>S  
Molecular Weight: 303.38

8.8453  
8.8242  
8.7057  
8.6937  
8.5760  
7.5728  
7.5533  
7.4033  
7.4009  
7.3827  
7.3644  
7.3620  
7.2895  
7.2884  
7.2280  
7.2239  
7.2063  
7.1927  
7.1747  
7.1547  
7.0987  
7.0955  
7.0815  
7.0812  
7.0695  
7.0575

-0.0001

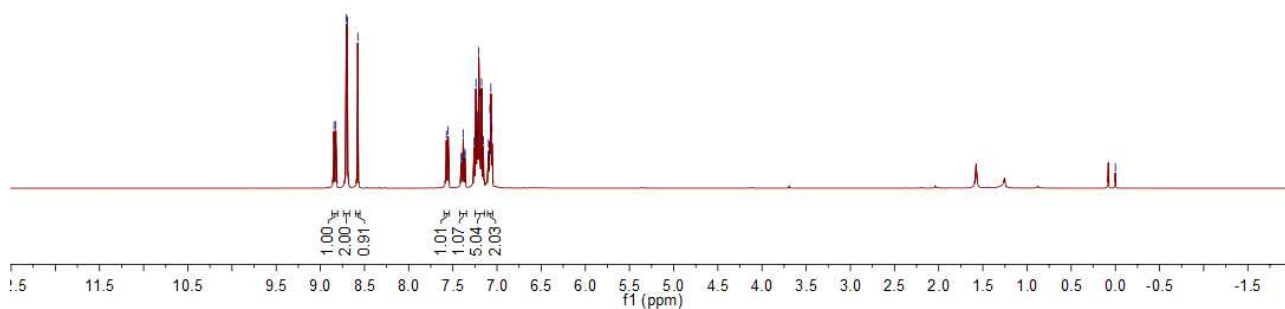

158.2778  
157.3086  
137.7532  
136.0694  
135.6665  
131.5191  
128.8342  
126.7688  
125.2753  
124.5780  
122.8342  
119.8434  
116.7943  
116.5735  
108.4329  
77.3883  
77.0885  
76.7511

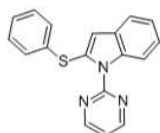

Chemical Formula: C<sub>18</sub>H<sub>13</sub>N<sub>3</sub>S  
Molecular Weight: 303.38

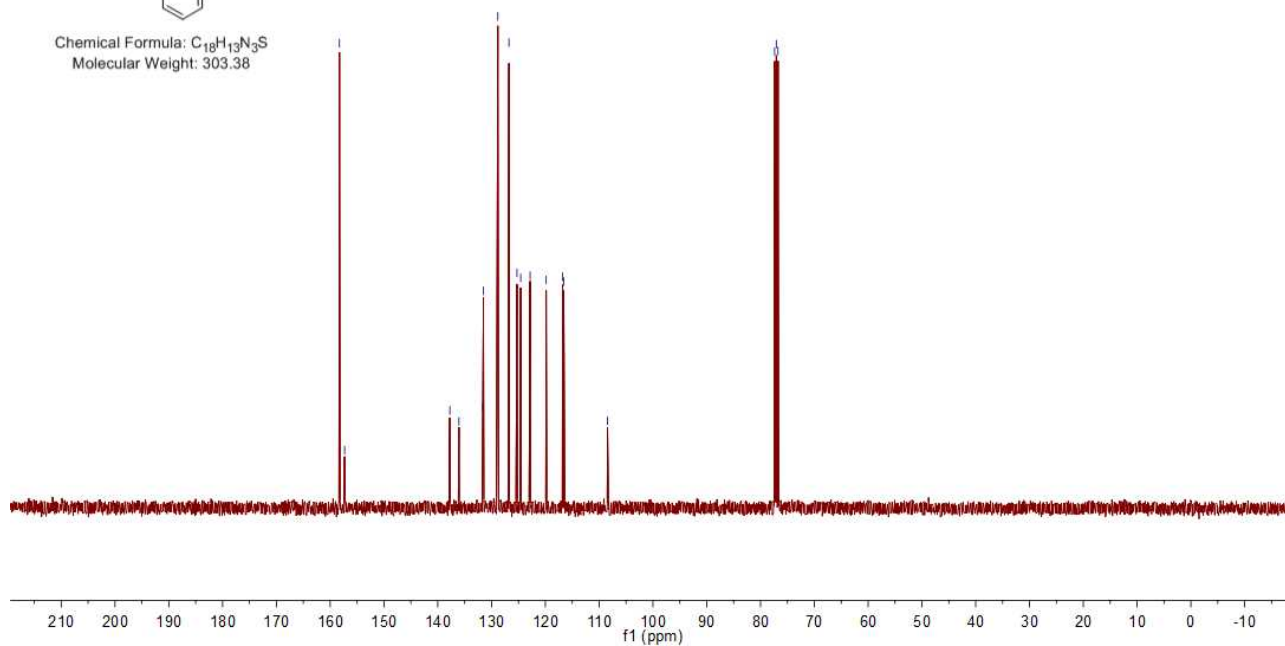

2-((4-methylphenyl)thio)-1-(pyrimidin-2-yl)-1H-indole (7b)

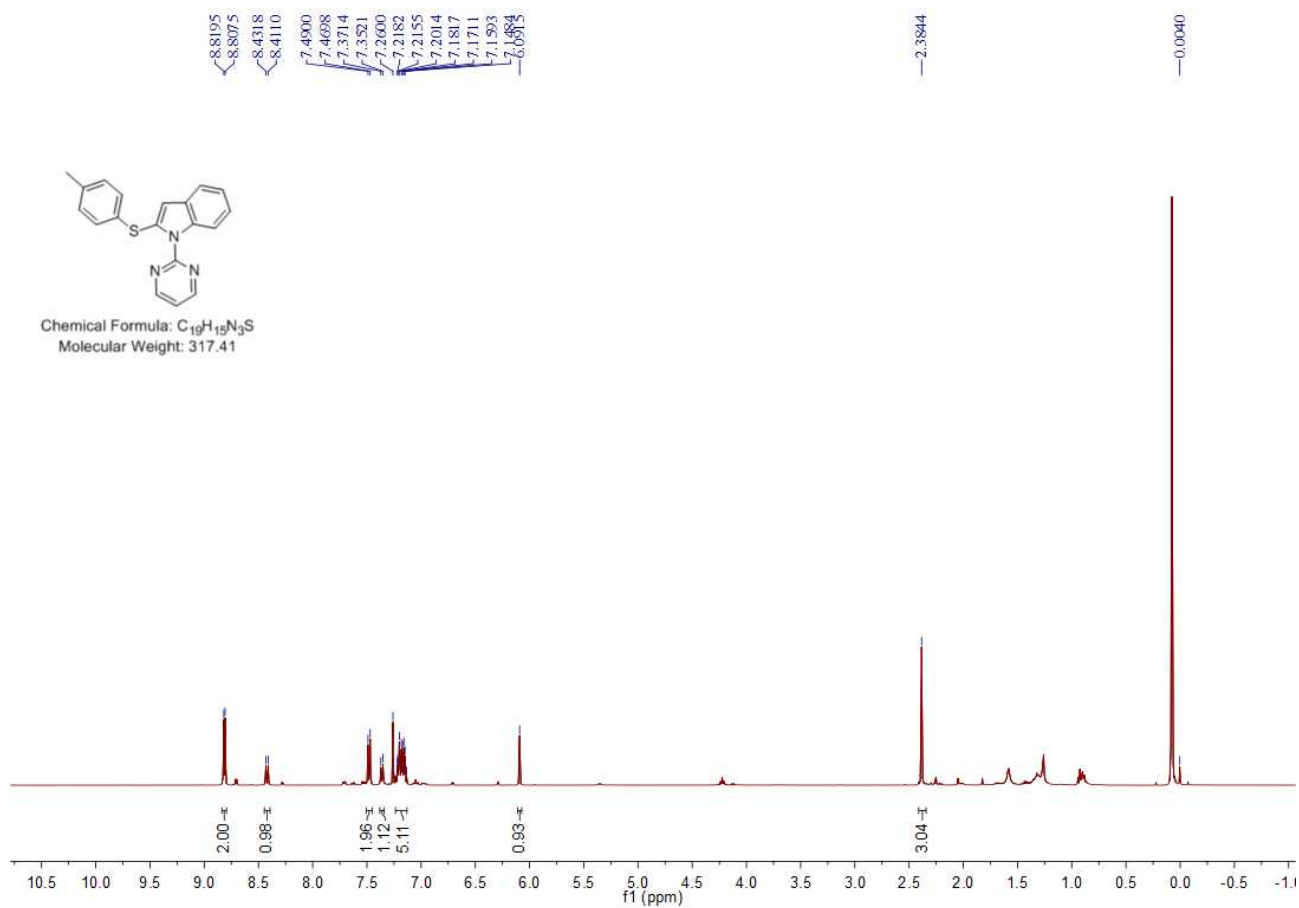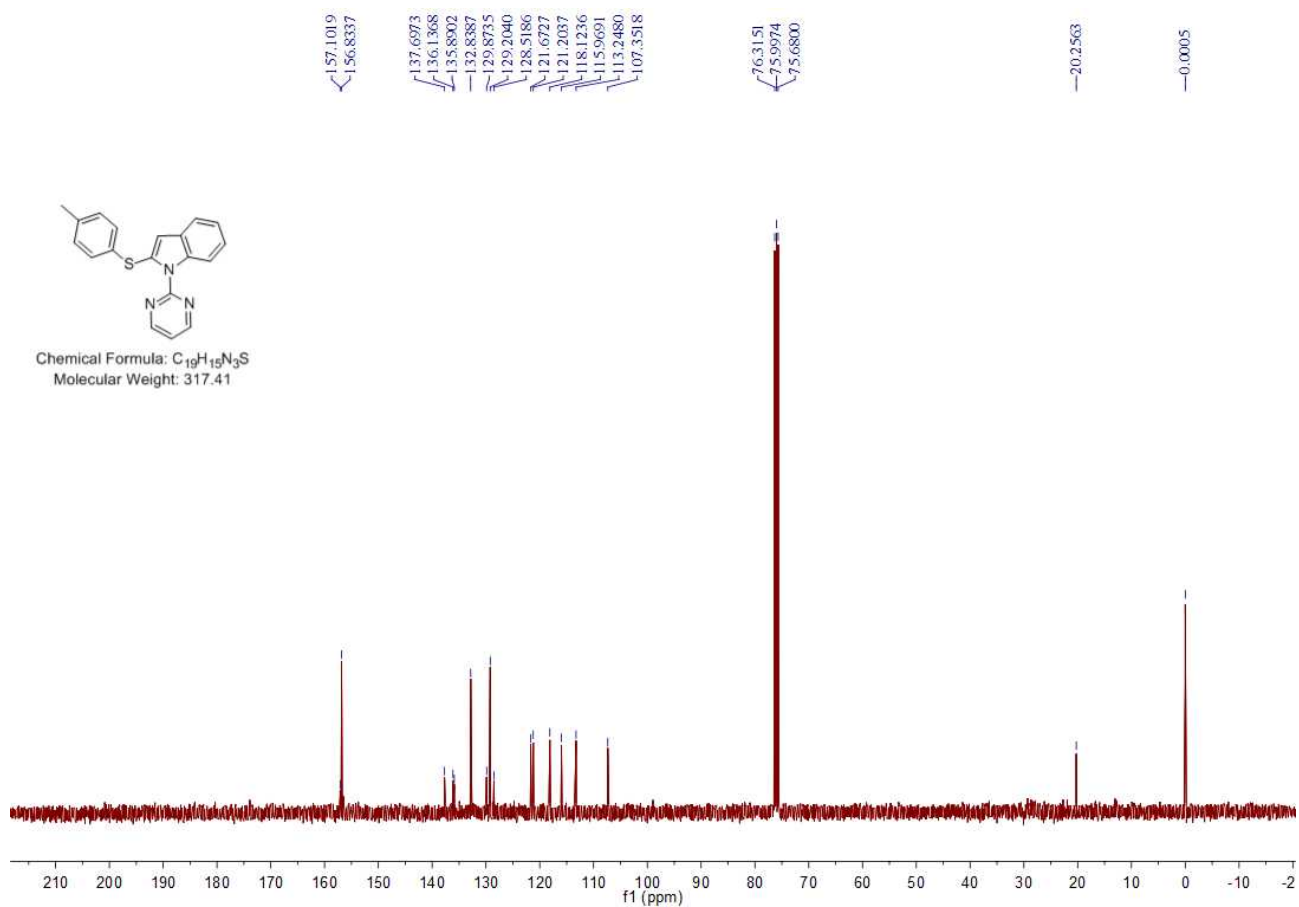

2-((4-Methoxyphenyl)thio)-1-(pyrimidin-2-yl)-1H-indole (7c)

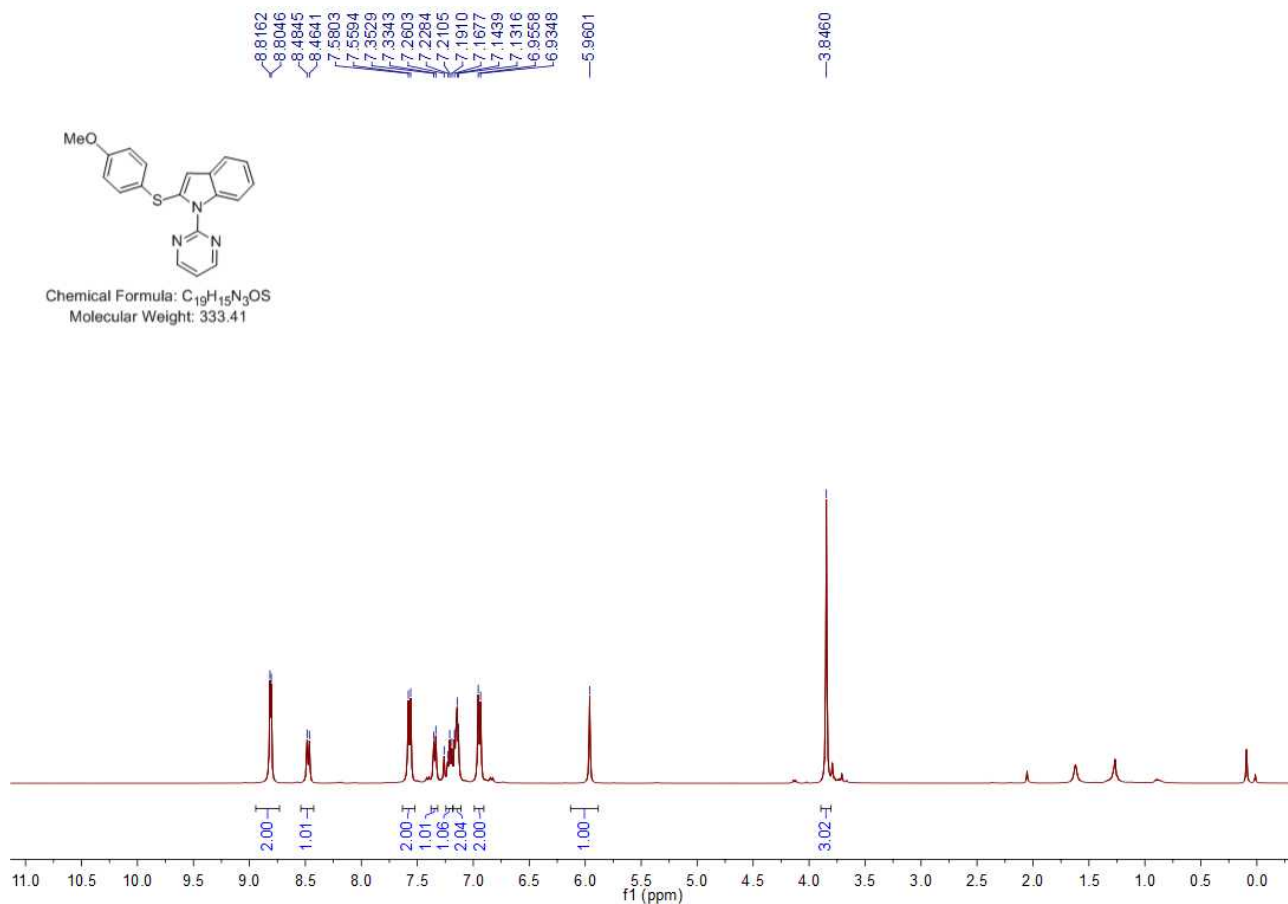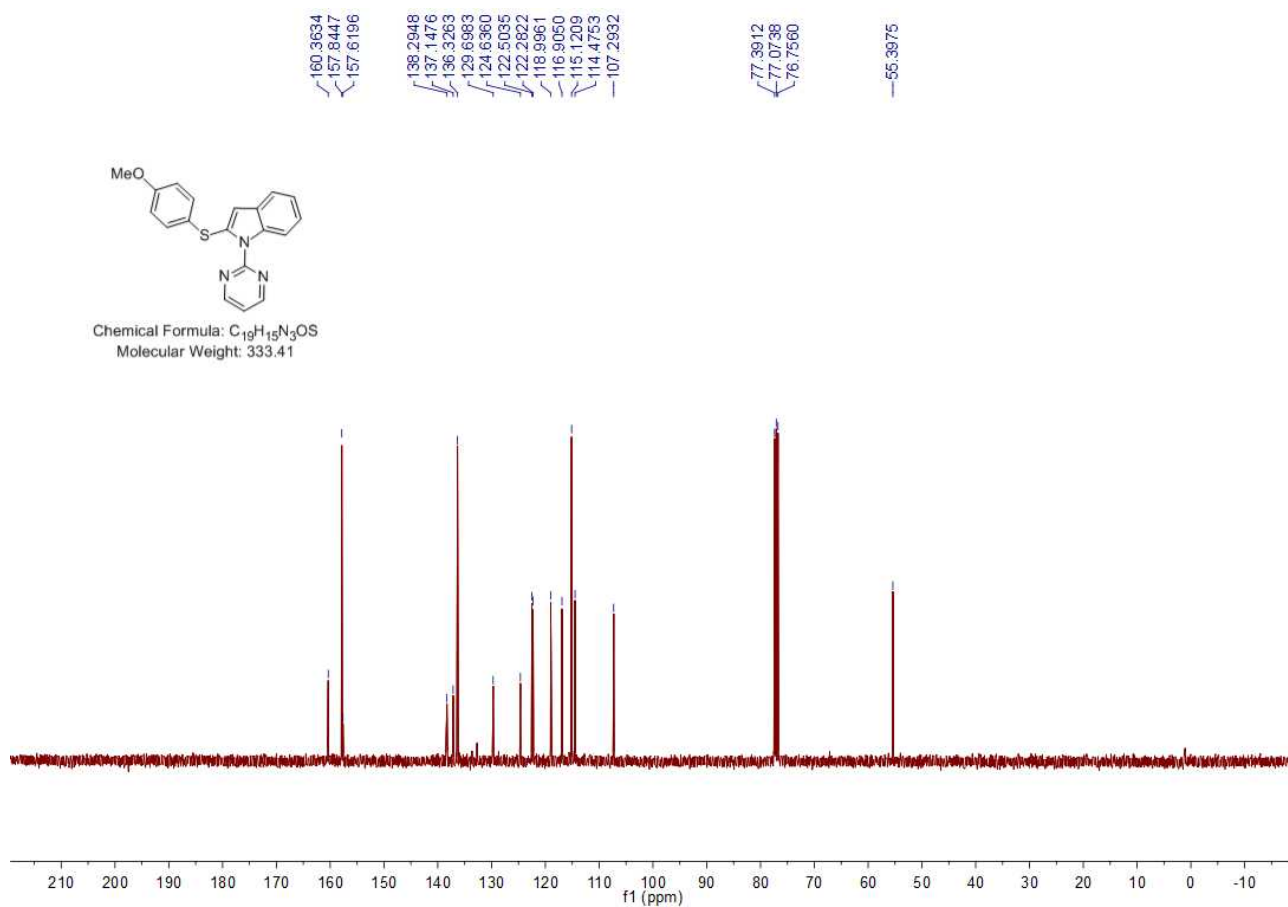

## 2-((4-Chlorophenyl)thio)-1-(pyrimidin-2-yl)-1H-indole (7d)

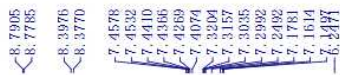

0.0001

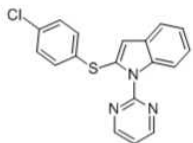

Chemical Formula: C<sub>18</sub>H<sub>12</sub>ClN<sub>3</sub>S  
Molecular Weight: 337.83

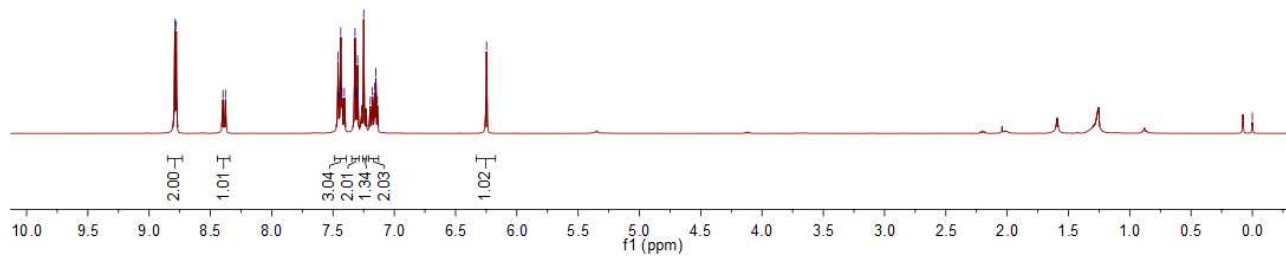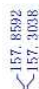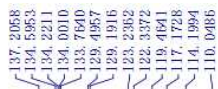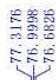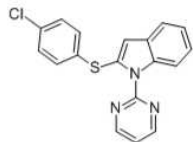

Chemical Formula: C<sub>18</sub>H<sub>12</sub>ClN<sub>3</sub>S  
Molecular Weight: 337.83

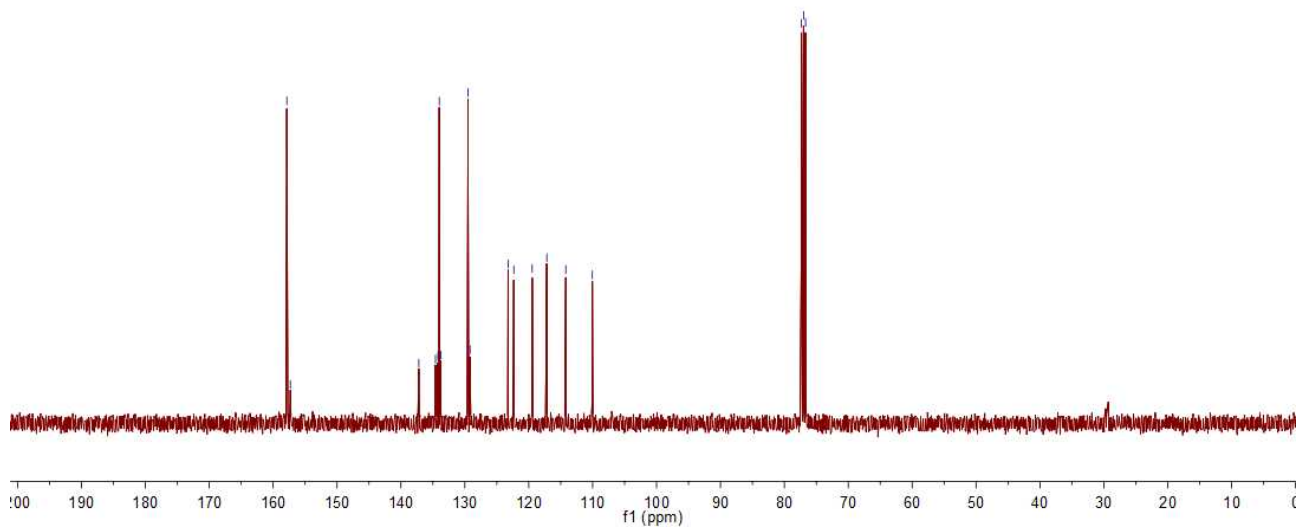

## 2-((4-Nitroxyphenyl)thio)-1-(pyrimidin-2-yl)-1H-indole (7e)

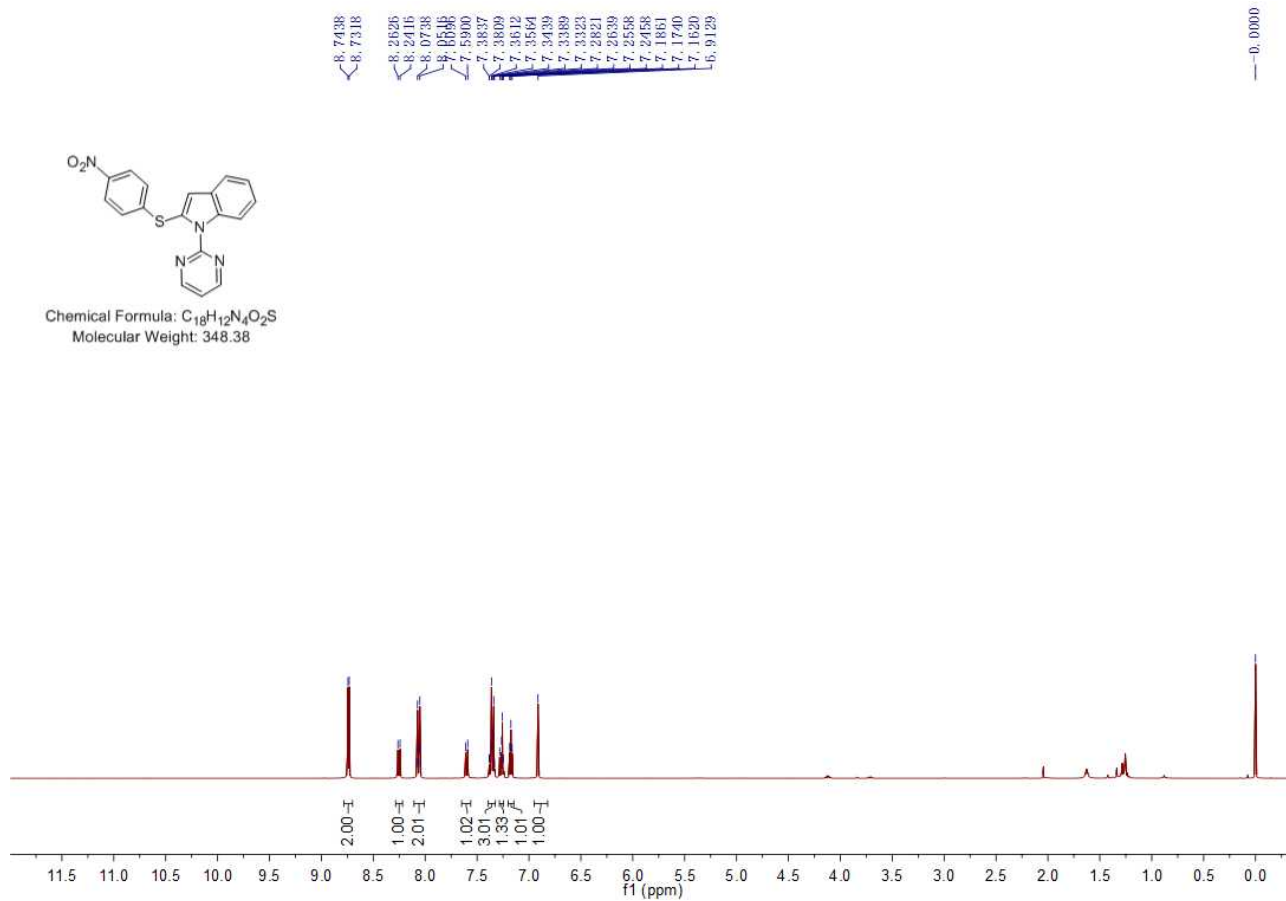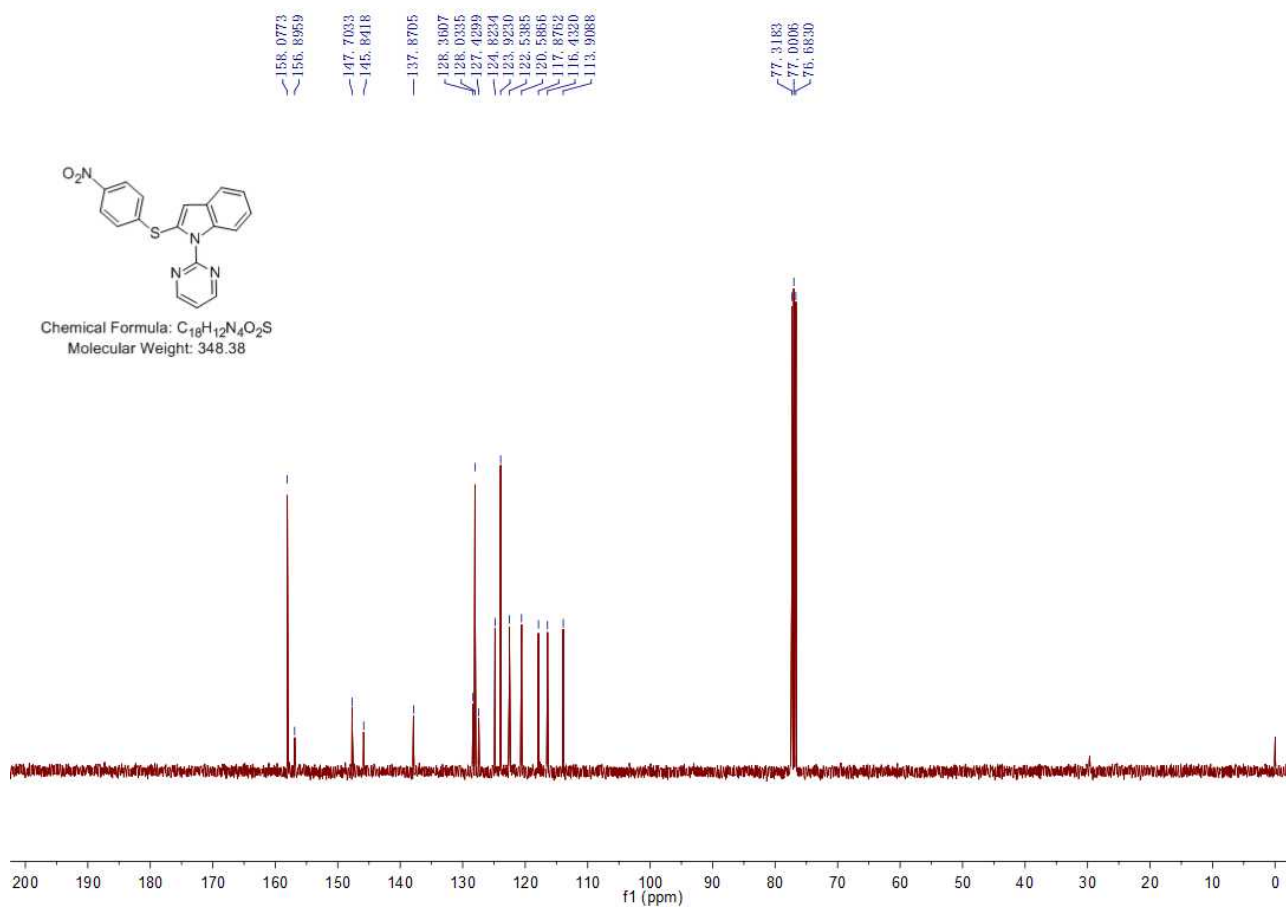

## 2-((Benzyl)thio)-1-(pyrimidin-2-yl)-1H-indole (7f)

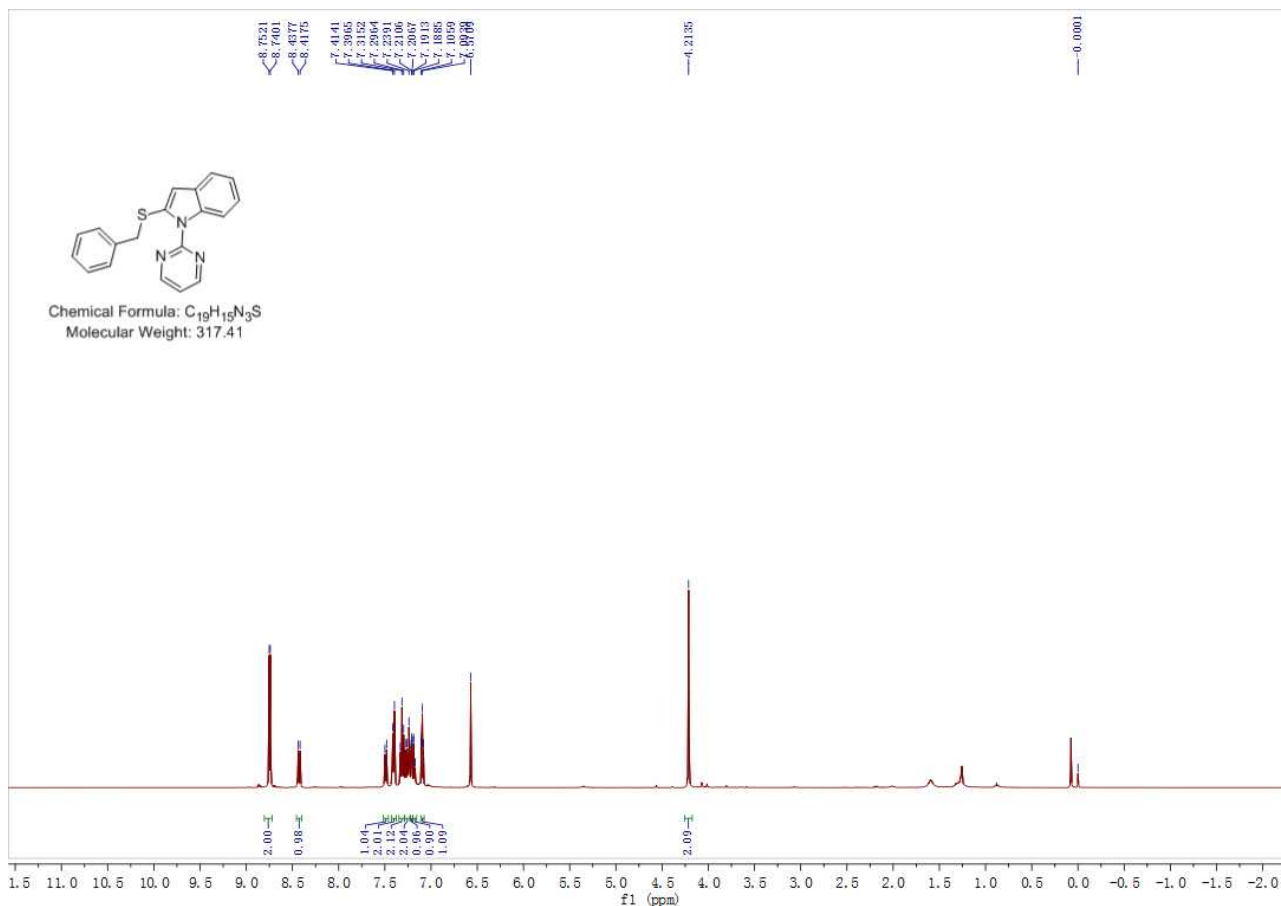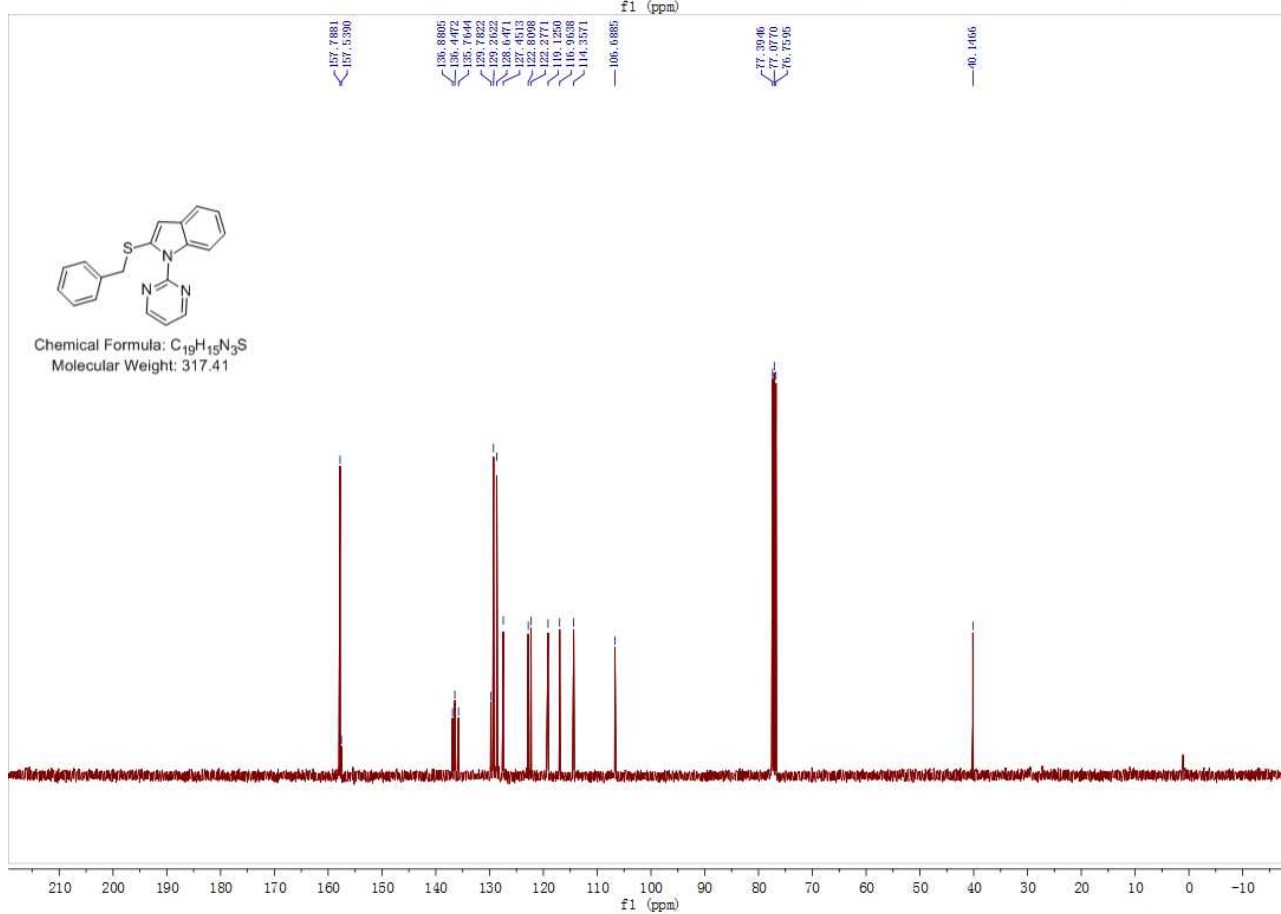



## 2-( Cyclohexylthio)-1-(pyrimidin-2-yl)-1H-indole (7g)

8.8120  
8.8000  
8.2116  
8.1917  
7.5126  
7.2337  
7.2008  
7.1834  
7.1609  
6.6751

3.2424  
3.2337  
2.0987  
2.0728  
1.7776  
1.7704  
1.7567  
1.7475  
1.6348  
1.6089  
1.3960  
1.3685  
1.3446  
1.3169  
1.2830  
1.2529  
1.2401  
0.0001

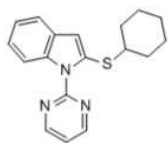

Chemical Formula: C<sub>18</sub>H<sub>19</sub>N<sub>3</sub>S  
Molecular Weight: 309.43

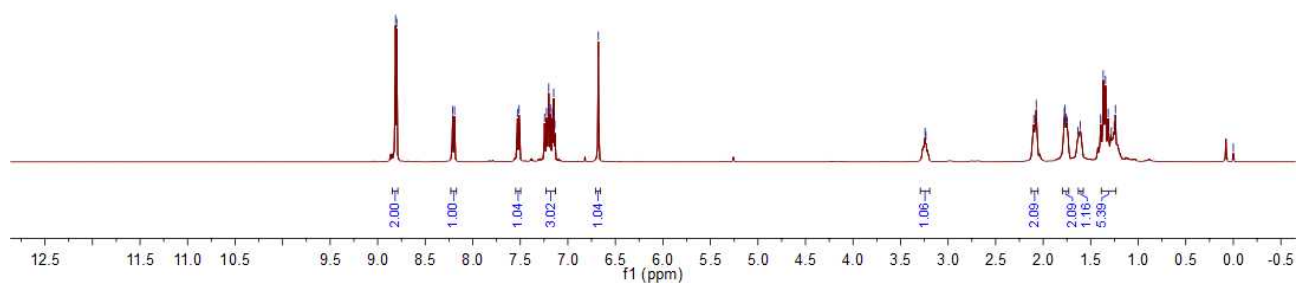

157.9713  
157.4700

137.2349  
133.3688  
129.4223  
122.8962  
122.0527  
119.3103  
117.3967  
113.4671  
109.1487

77.4033  
77.0878  
76.7702

47.5275

33.0011  
26.1848  
25.8461

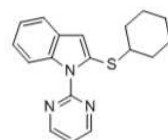

Chemical Formula: C<sub>18</sub>H<sub>19</sub>N<sub>3</sub>S  
Molecular Weight: 309.43

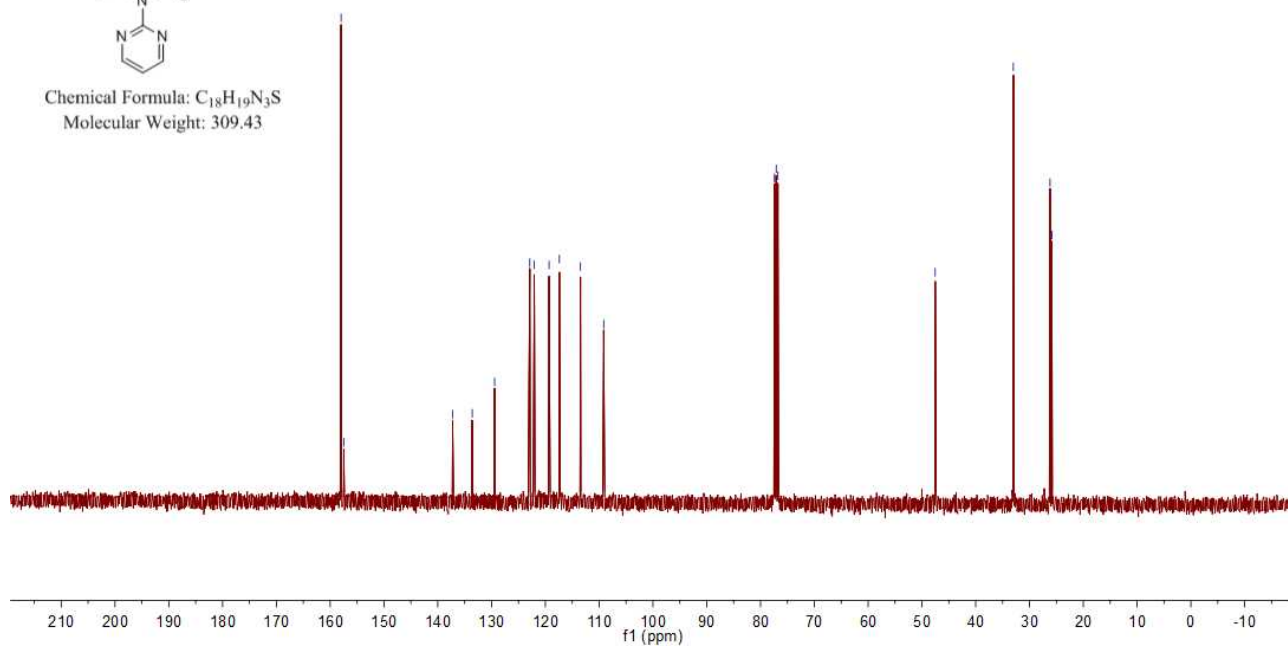

2-(2-(phenylthio)phenyl)quinoline(9)

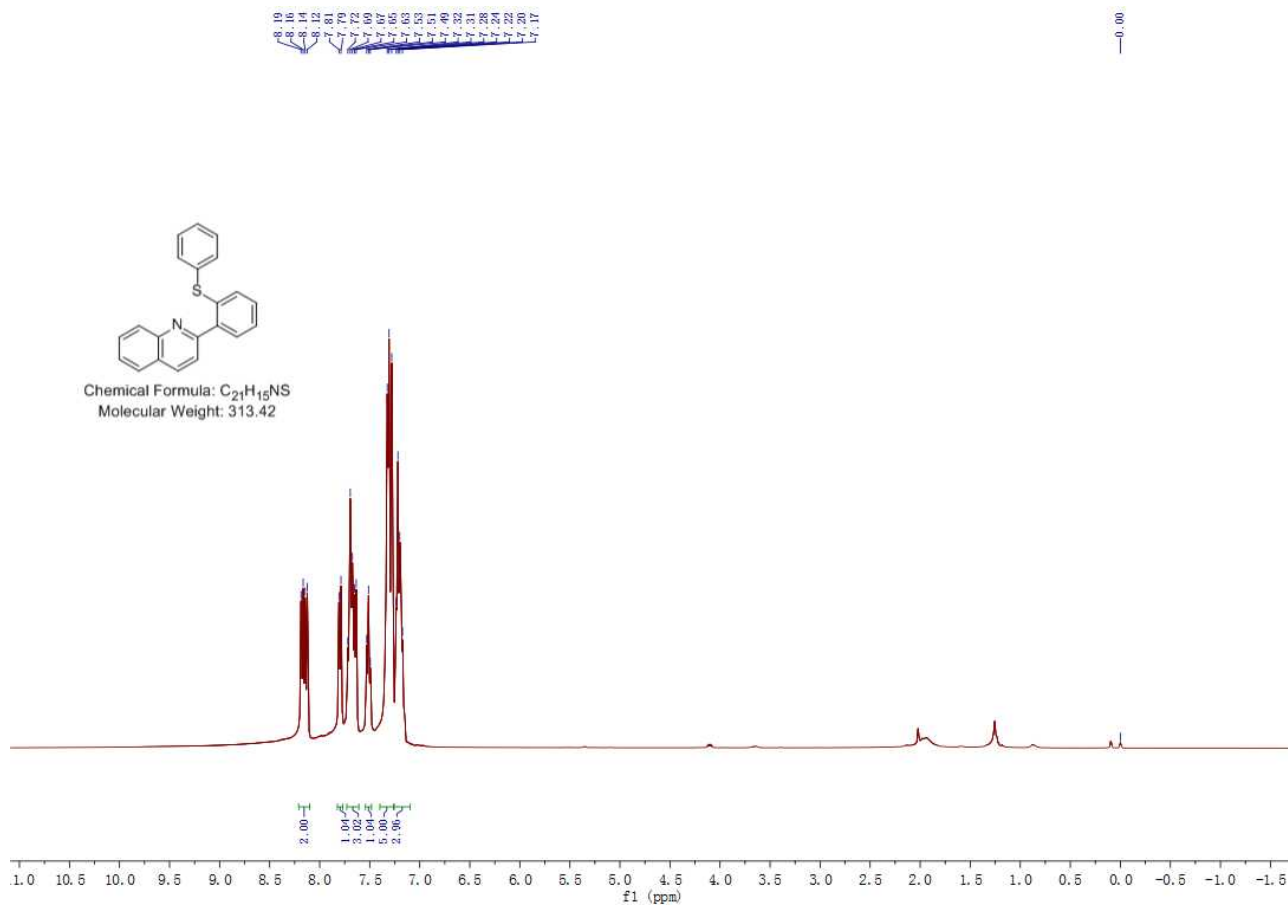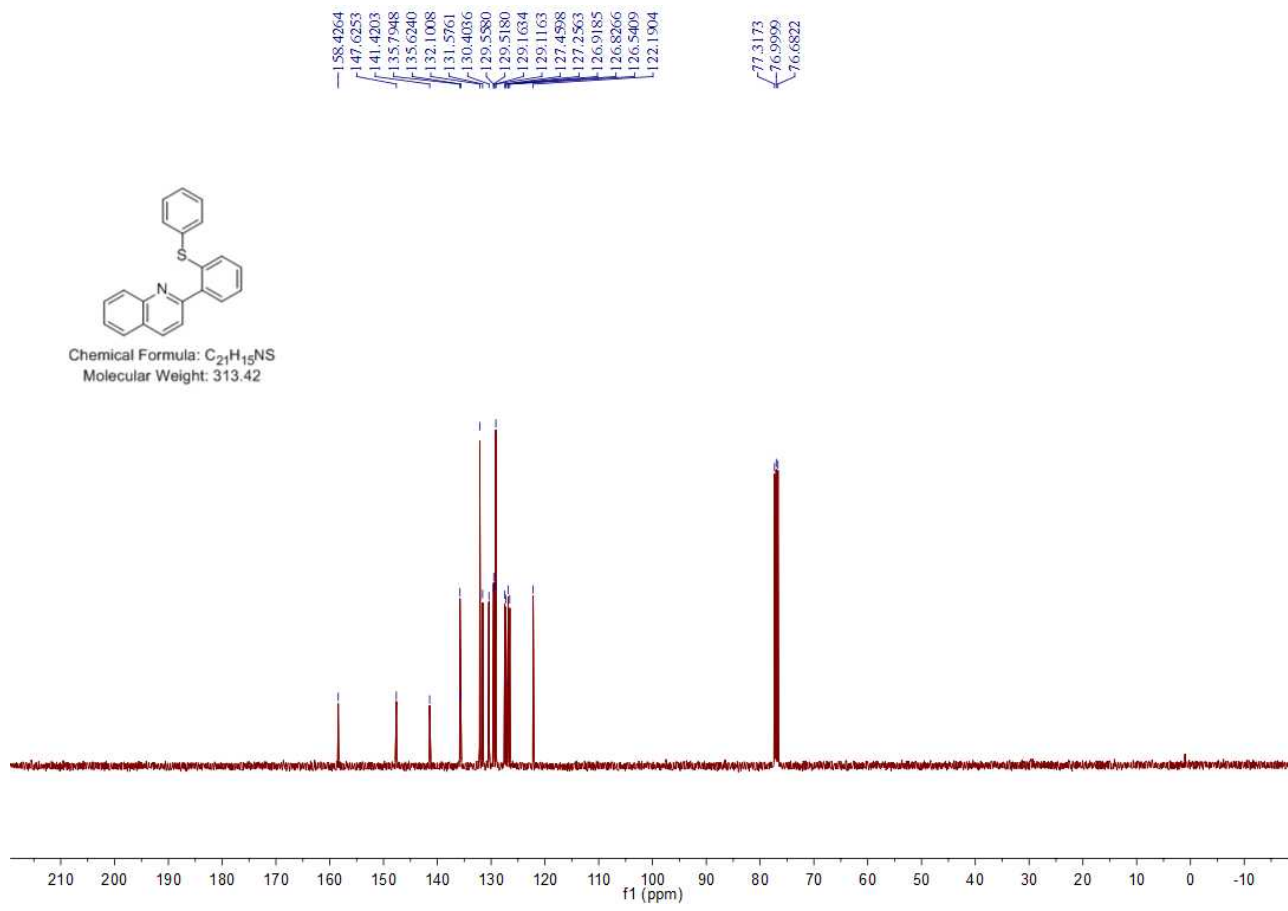

# N-Phenyl carbazole (1b)

8.1119  
8.0925  
7.5040  
7.4994  
7.4909  
7.3782  
7.3637  
7.3497  
7.2802  
7.2543  
7.2451  
7.2405  
7.2357  
7.2264

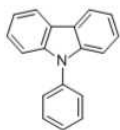

Chemical Formula: C<sub>18</sub>H<sub>13</sub>N  
Molecular Weight: 243.3025

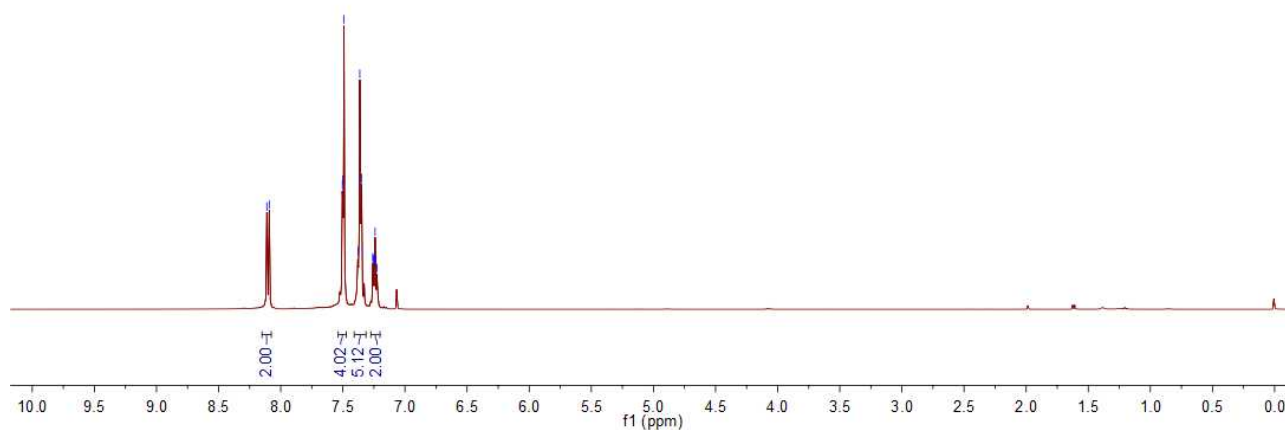

140.823  
137.633  
129.770  
127.330  
127.035  
125.866  
123.303  
120.242  
119.854  
109.697

77.318  
77.000  
76.682

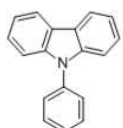

Chemical Formula: C<sub>18</sub>H<sub>13</sub>N  
Molecular Weight: 243.3025

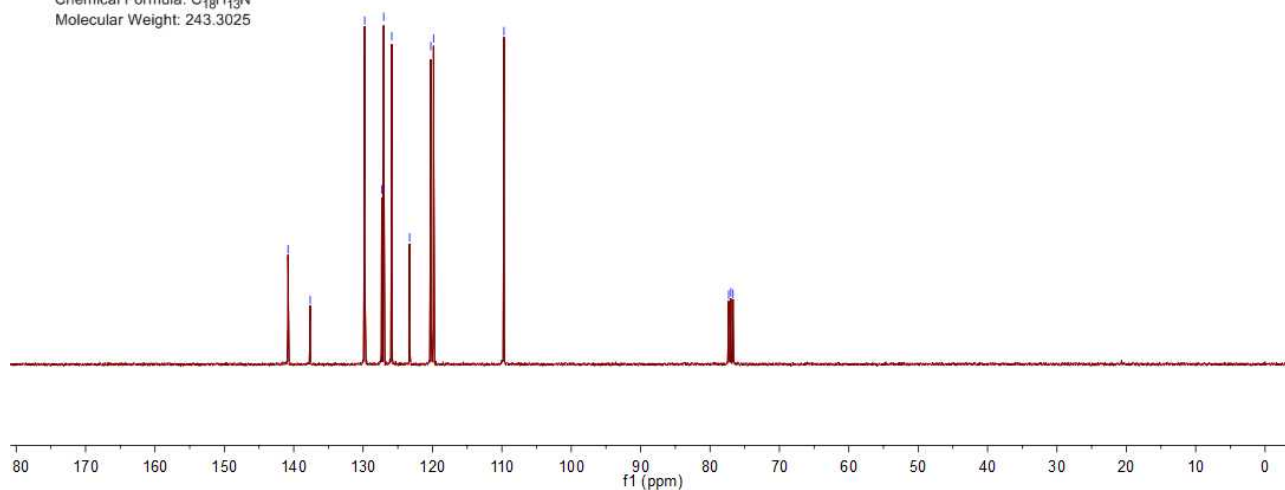

Supplement: c5ra04965b1.pdf [file c5ra04965b1.pdf]
